# Supplementary material for: Size dependence of optical nonlinearity for H-capped carbon chains, H–(CC)n–H (n = 3–15): analysis of its nature and prediction for long chains
Source: Royal Society of Chemistry journal article supplement (doi:10.1039/d3cp04150f), 2023-01-01
Supplement: d3cp04150f1.pdf [file d3cp04150f1.pdf]

## Supporting Information

### Size dependence of optical nonlinearity for H-capped carbon chains, H-(C≡C)<sub>n</sub>-H (*n* = 3-15): Analysis of its nature and prediction for long chains

Zeyu Liu,<sup>\*a</sup> Jiaojiao Wang,<sup>a</sup> Qing Zhou,<sup>a</sup> Tian Lu,<sup>\*b</sup> Xia Wang,<sup>a</sup> Xiufen Yan,<sup>a</sup>  
Mengdi Zhao<sup>c</sup> and Aihua Yuan<sup>\*a</sup>

<sup>a</sup>*School of Environmental and Chemical Engineering, Jiangsu University of Science and Technology, Zhenjiang 212100, People's Republic of China*

<sup>b</sup>*Beijing Kein Research Center for Natural Sciences, Beijing 100022, People's Republic of China*

<sup>c</sup>*Department of Materials Science and Engineering, Suzhou University of Science and Technology, Suzhou 215009, People's Republic of China*

## Contents:

|                                                                                                                                                                                                                                                                                                                                                                                                                          |     |
|--------------------------------------------------------------------------------------------------------------------------------------------------------------------------------------------------------------------------------------------------------------------------------------------------------------------------------------------------------------------------------------------------------------------------|-----|
| <b>Table S1</b> Optimized Cartesian coordinates (in Å) of the carbon chains H-(C≡C) <sub>n</sub> -H ( <i>n</i> = 10-14) at the ωB97XD/def2-TZVP level.....                                                                                                                                                                                                                                                               | S5  |
| <b>Table S2</b> Calculated polarizability of the carbon chains H-(C≡C) <sub>n</sub> -H ( <i>n</i> = 3-15) in the zero-frequency limit ( $\lambda = \infty$ nm) and in the frequency-dependent fields ( $\lambda = 1907, 1460, 1340,$ and $1064$ nm) at the ωB97XD/LPol-ds level.....                                                                                                                                     | S11 |
| <b>Table S3</b> Calculated second hyperpolarizability of the carbon chains H-(C≡C) <sub>n</sub> -H ( <i>n</i> = 3-15) in the zero-frequency limit ( $\lambda = \infty$ nm) and in the frequency-dependent fields ( $\lambda = 1907, 1460, 1340,$ and $1064$ nm) at the ωB97XD/LPol-ds level.....                                                                                                                         | S14 |
| <b>Fig. S1</b> Static second hyperpolarizability tensors as a function of the number of C-C units ( <i>n</i> ) in the carbon chains at the ωB97XD/LPol-ds level.....                                                                                                                                                                                                                                                     | S17 |
| <b>Fig. S2</b> Hyperpolarizability density $-x^{(3)}_{xxx}(\vec{r})$ isosurfaces (isovalue = 10 au) of the carbon chains H-(C≡C) <sub>n</sub> -H ( <i>n</i> = 3, 6, 9, 12, and 15) at the ωB97XD/LPol-ds level.....                                                                                                                                                                                                      | S18 |
| <b>Fig. S3</b> Hyperpolarizability density $-y^{(3)}_{yyy}(\vec{r})$ isosurfaces (isovalue = 10 au) of the carbon chains H-(C≡C) <sub>n</sub> -H ( <i>n</i> = 3, 6, 9, 12, and 15) at the ωB97XD/LPol-ds level.....                                                                                                                                                                                                      | S19 |
| <b>Fig. S4</b> Volumes of the carbon chains H-(C≡C) <sub>n</sub> -H ( <i>n</i> = 3-15) as a function of the number of C-C units in the chains.....                                                                                                                                                                                                                                                                       | S20 |
| <b>Table S4</b> Total molecular polarizability [ $\alpha_{\text{iso}}(\lambda)$ , $\lambda = \infty, 1907, 1460, 1340,$ and $1064$ nm] and total second hyperpolarizability [ $\gamma_{\parallel}(\lambda), \lambda = \infty, 1907, 1460, 1340,$ and $1064$ nm] versus the number of carbon atoms ( <i>n</i> <sub>C</sub> ) in carbon chains H-(C≡C) <sub>n</sub> -H ( <i>n</i> = 3-15) at the ωB97XD/LPol-ds level..... | S21 |
| <b>Table S5</b> Vertical ionization energy ( <i>VIE</i> ) and vertical electron affinity ( <i>VEA</i> ) of the carbon chains H-(C≡C) <sub>n</sub> -H ( <i>n</i> = 3-15) at the ωB97XD/def2-TZVP level.....                                                                                                                                                                                                               | S24 |
| <b>Table S6</b> Calculated polarizability of the carbon chains H-(C≡C) <sub>n</sub> -H ( <i>n</i> = 3-15) in the zero-frequency limit ( $\lambda = \infty$ nm) and in the frequency-dependent fields ( $\lambda = 1907, 1460, 1340,$ and $1064$ nm) at the ωB97XD/aug-cc-pVTZ level.....                                                                                                                                 | S25 |
| <b>Table S7</b> Calculated second hyperpolarizability of the carbon chains H-(C≡C) <sub>n</sub> -H ( <i>n</i> = 3-15) in the zero-frequency limit ( $\lambda = \infty$ nm) and in the frequency-dependent fields                                                                                                                                                                                                         |     |

|                                                                                                                                                                                                                                                                                                                                                             |     |
|-------------------------------------------------------------------------------------------------------------------------------------------------------------------------------------------------------------------------------------------------------------------------------------------------------------------------------------------------------------|-----|
| ( $\lambda = 1907, 1460, 1340, \text{ and } 1064 \text{ nm}$ ) at the $\omega\text{B97XD/aug-cc-pVTZ}$ level.....                                                                                                                                                                                                                                           | S28 |
| <b>Table S8</b> Calculated polarizability of the carbon chains $\text{H}-(\text{C}\equiv\text{C})_n\text{-H}$ ( $n = 3\text{-}15$ ) in the zero-frequency limit ( $\lambda = \infty \text{ nm}$ ) and in the frequency-dependent fields ( $\lambda = 1907, 1460, 1340, \text{ and } 1064 \text{ nm}$ ) at the CAM-B3LYP/LPol-ds level.....                  | S31 |
| <b>Table S9</b> Calculated second hyperpolarizability of the carbon chains $\text{H}-(\text{C}\equiv\text{C})_n\text{-H}$ ( $n = 3\text{-}15$ ) in the zero-frequency limit ( $\lambda = \infty \text{ nm}$ ) and in the frequency-dependent fields ( $\lambda = 1907, 1460, 1340, \text{ and } 1064 \text{ nm}$ ) at the CAM-B3LYP/LPol-ds level.....      | S34 |
| <b>Table S10</b> Calculated second hyperpolarizability of the carbon chains $\text{H}-(\text{C}\equiv\text{C})_n\text{-H}$ ( $n = 3\text{-}15$ ) in the zero-frequency limit ( $\lambda = \infty \text{ nm}$ ) and in the frequency-dependent fields ( $\lambda = 1907, 1460, 1340, \text{ and } 1064 \text{ nm}$ ) at the CAM-B3LYP/aug-cc-pVTZ level..... | S37 |
| <b>Table S11</b> Calculated second hyperpolarizability of the carbon chains $\text{H}-(\text{C}\equiv\text{C})_n\text{-H}$ ( $n = 3\text{-}15$ ) in the zero-frequency limit ( $\lambda = \infty \text{ nm}$ ) and in the frequency-dependent fields ( $\lambda = 1907, 1460, 1340, \text{ and } 1064 \text{ nm}$ ) at the CAM-B3LYP/aug-cc-pVTZ level..... | S40 |
| <b>Table S12</b> Calculated polarizability of the carbon chains $\text{H}-(\text{C}\equiv\text{C})_n\text{-H}$ ( $n = 3\text{-}15$ ) in the zero-frequency limit ( $\lambda = \infty \text{ nm}$ ) and in the frequency-dependent fields ( $\lambda = 1907, 1460, 1340, \text{ and } 1064 \text{ nm}$ ) at the PBE38/LPol-ds level.....                     | S43 |
| <b>Table S13</b> Calculated second hyperpolarizability of the carbon chains $\text{H}-(\text{C}\equiv\text{C})_n\text{-H}$ ( $n = 3\text{-}15$ ) in the zero-frequency limit ( $\lambda = \infty \text{ nm}$ ) and in the frequency-dependent fields ( $\lambda = 1907, 1460, 1340, \text{ and } 1064 \text{ nm}$ ) at the PBE38/LPol-ds level.....         | S46 |
| <b>Table S14</b> Calculated second hyperpolarizability of the carbon chains $\text{H}-(\text{C}\equiv\text{C})_n\text{-H}$ ( $n = 3\text{-}15$ ) in the zero-frequency limit ( $\lambda = \infty \text{ nm}$ ) and in the frequency-dependent fields ( $\lambda = 1907, 1460, 1340, \text{ and } 1064 \text{ nm}$ ) at the PBE38/aug-cc-pVTZ level.....     | S49 |
| <b>Table S15</b> Calculated second hyperpolarizability of the carbon chains $\text{H}-(\text{C}\equiv\text{C})_n\text{-H}$ ( $n = 3\text{-}15$ ) in the zero-frequency limit ( $\lambda = \infty \text{ nm}$ ) and in the frequency-dependent fields                                                                                                        |     |

( $\lambda$  = 1907, 1460, 1340, and 1064 nm) at the PBE38/aug-cc-pVTZ level.....S52

**Table S1** Optimized Cartesian coordinates (in Å) of the carbon chains H-(C≡C)<sub>n</sub>-H (*n* = 10-14) at the ωB97XD/def2-TZVP level

| H-(C≡C) <sub>10</sub> -H (Charge = 0, Spin multiplicity = 1) |            |            |              |
|--------------------------------------------------------------|------------|------------|--------------|
| Atom                                                         | <i>x</i>   | <i>y</i>   | <i>z</i>     |
| C                                                            | 0.00000000 | 0.00000000 | -10.94314807 |
| C                                                            | 0.00000000 | 0.00000000 | -12.14485568 |
| C                                                            | 0.00000000 | 0.00000000 | -9.58024794  |
| C                                                            | 0.00000000 | 0.00000000 | -8.37065151  |
| C                                                            | 0.00000000 | 0.00000000 | -7.01645174  |
| C                                                            | 0.00000000 | 0.00000000 | -5.80447148  |
| C                                                            | 0.00000000 | 0.00000000 | -4.45251089  |
| C                                                            | 0.00000000 | 0.00000000 | -3.23980008  |
| C                                                            | 0.00000000 | 0.00000000 | -1.88853814  |
| C                                                            | 0.00000000 | 0.00000000 | -0.67561848  |
| C                                                            | 0.00000000 | 0.00000000 | 0.67549497   |
| C                                                            | 0.00000000 | 0.00000000 | 1.88839776   |
| C                                                            | 0.00000000 | 0.00000000 | 3.23972262   |
| C                                                            | 0.00000000 | 0.00000000 | 4.45238032   |
| C                                                            | 0.00000000 | 0.00000000 | 5.80447915   |
| C                                                            | 0.00000000 | 0.00000000 | 7.01637416   |
| C                                                            | 0.00000000 | 0.00000000 | 8.37077364   |
| C                                                            | 0.00000000 | 0.00000000 | 9.58032176   |
| C                                                            | 0.00000000 | 0.00000000 | 10.94330074  |
| C                                                            | 0.00000000 | 0.00000000 | 12.14501692  |
| H                                                            | 0.00000000 | 0.00000000 | 13.20906425  |
| H                                                            | 0.00000000 | 0.00000000 | -13.20887227 |
| H-(C≡C) <sub>11</sub> -H (Charge = 0, Spin multiplicity = 1) |            |            |              |
| Atom                                                         | <i>x</i>   | <i>y</i>   | <i>z</i>     |

|   |            |            |              |
|---|------------|------------|--------------|
| C | 0.00000000 | 0.00000000 | -9.65249682  |
| C | 0.00000000 | 0.00000000 | -10.86209055 |
| C | 0.00000000 | 0.00000000 | -12.22497740 |
| C | 0.00000000 | 0.00000000 | -13.42667887 |
| C | 0.00000000 | 0.00000000 | -8.29831626  |
| C | 0.00000000 | 0.00000000 | -7.08633605  |
| C | 0.00000000 | 0.00000000 | -5.73440825  |
| C | 0.00000000 | 0.00000000 | -4.52168882  |
| C | 0.00000000 | 0.00000000 | -3.17049121  |
| C | 0.00000000 | 0.00000000 | -1.95753941  |
| C | 0.00000000 | 0.00000000 | -0.60656497  |
| C | 0.00000000 | 0.00000000 | 0.60643347   |
| C | 0.00000000 | 0.00000000 | 1.95742985   |
| C | 0.00000000 | 0.00000000 | 3.17035609   |
| C | 0.00000000 | 0.00000000 | 4.52162688   |
| C | 0.00000000 | 0.00000000 | 5.73428924   |
| C | 0.00000000 | 0.00000000 | 7.08635886   |
| C | 0.00000000 | 0.00000000 | 8.29825239   |
| C | 0.00000000 | 0.00000000 | 9.65263298   |
| C | 0.00000000 | 0.00000000 | 10.86217760  |
| C | 0.00000000 | 0.00000000 | 12.22514356  |
| C | 0.00000000 | 0.00000000 | 13.42685350  |
| H | 0.00000000 | 0.00000000 | 14.49090850  |
| H | 0.00000000 | 0.00000000 | -14.49070324 |

H-(C≡C)<sub>12</sub>-H (Charge = 0, Spin multiplicity = 1)

| Atom | <i>x</i>   | <i>y</i>   | <i>z</i>    |
|------|------------|------------|-------------|
| C    | 0.00000000 | 0.00000000 | -8.36819084 |
| C    | 0.00000000 | 0.00000000 | -9.58016718 |

|   |            |            |              |
|---|------------|------------|--------------|
| C | 0.00000000 | 0.00000000 | -10.93433954 |
| C | 0.00000000 | 0.00000000 | -12.14393004 |
| C | 0.00000000 | 0.00000000 | -13.50680948 |
| C | 0.00000000 | 0.00000000 | -14.70850577 |
| C | 0.00000000 | 0.00000000 | -7.01627812  |
| C | 0.00000000 | 0.00000000 | -5.80355949  |
| C | 0.00000000 | 0.00000000 | -4.45239165  |
| C | 0.00000000 | 0.00000000 | -3.23943170  |
| C | 0.00000000 | 0.00000000 | -1.88851899  |
| C | 0.00000000 | 0.00000000 | -0.67548881  |
| C | 0.00000000 | 0.00000000 | 0.67537100   |
| C | 0.00000000 | 0.00000000 | 1.88839256   |
| C | 0.00000000 | 0.00000000 | 3.23933718   |
| C | 0.00000000 | 0.00000000 | 4.45226792   |
| C | 0.00000000 | 0.00000000 | 5.80351166   |
| C | 0.00000000 | 0.00000000 | 7.01617270   |
| C | 0.00000000 | 0.00000000 | 8.36822544   |
| C | 0.00000000 | 0.00000000 | 9.58011633   |
| C | 0.00000000 | 0.00000000 | 10.93448459  |
| C | 0.00000000 | 0.00000000 | 12.14402614  |
| C | 0.00000000 | 0.00000000 | 13.50698289  |
| C | 0.00000000 | 0.00000000 | 14.70868791  |
| H | 0.00000000 | 0.00000000 | 15.77274874  |
| H | 0.00000000 | 0.00000000 | -15.77253680 |

H-(C≡C)<sub>13</sub>-H (Charge = 0, Spin multiplicity = 1)

| Atom | <i>x</i>   | <i>y</i>   | <i>z</i>    |
|------|------------|------------|-------------|
| C    | 0.00000000 | 0.00000000 | -7.08541936 |
| C    | 0.00000000 | 0.00000000 | -8.29813163 |

|   |            |            |              |
|---|------------|------------|--------------|
| C | 0.00000000 | 0.00000000 | -9.65004382  |
| C | 0.00000000 | 0.00000000 | -10.86201181 |
| C | 0.00000000 | 0.00000000 | -12.21618940 |
| C | 0.00000000 | 0.00000000 | -13.42577567 |
| C | 0.00000000 | 0.00000000 | -14.78865495 |
| C | 0.00000000 | 0.00000000 | -15.99034642 |
| C | 0.00000000 | 0.00000000 | -5.73426236  |
| C | 0.00000000 | 0.00000000 | -4.52130443  |
| C | 0.00000000 | 0.00000000 | -3.17041864  |
| C | 0.00000000 | 0.00000000 | -1.95738109  |
| C | 0.00000000 | 0.00000000 | -0.60658071  |
| C | 0.00000000 | 0.00000000 | 0.60647202   |
| C | 0.00000000 | 0.00000000 | 1.95728214   |
| C | 0.00000000 | 0.00000000 | 3.17030777   |
| C | 0.00000000 | 0.00000000 | 4.52122728   |
| C | 0.00000000 | 0.00000000 | 5.73415641   |
| C | 0.00000000 | 0.00000000 | 7.08538512   |
| C | 0.00000000 | 0.00000000 | 8.29804347   |
| C | 0.00000000 | 0.00000000 | 9.65008557   |
| C | 0.00000000 | 0.00000000 | 10.86197387  |
| C | 0.00000000 | 0.00000000 | 12.21633361  |
| C | 0.00000000 | 0.00000000 | 13.42587262  |
| C | 0.00000000 | 0.00000000 | 14.78882260  |
| C | 0.00000000 | 0.00000000 | 15.99052380  |
| H | 0.00000000 | 0.00000000 | 17.05458913  |
| H | 0.00000000 | 0.00000000 | -17.05438487 |

---

H-(C≡C)<sub>14</sub>-H (Charge = 0, Spin multiplicity = 1)

---

| Atom | <i>x</i> | <i>y</i> | <i>z</i> |
|------|----------|----------|----------|
|------|----------|----------|----------|

---



---

|   |            |            |              |
|---|------------|------------|--------------|
| C | 0.00000000 | 0.00000000 | -5.80316287  |
| C | 0.00000000 | 0.00000000 | -7.01611132  |
| C | 0.00000000 | 0.00000000 | -8.36727621  |
| C | 0.00000000 | 0.00000000 | -9.57997308  |
| C | 0.00000000 | 0.00000000 | -10.93190855 |
| C | 0.00000000 | 0.00000000 | -12.14385675 |
| C | 0.00000000 | 0.00000000 | -13.49806874 |
| C | 0.00000000 | 0.00000000 | -14.70764633 |
| C | 0.00000000 | 0.00000000 | -16.07053826 |
| C | 0.00000000 | 0.00000000 | -17.27222449 |
| C | 0.00000000 | 0.00000000 | -4.45228360  |
| C | 0.00000000 | 0.00000000 | -3.23924959  |
| C | 0.00000000 | 0.00000000 | -1.88847353  |
| C | 0.00000000 | 0.00000000 | -0.67541430  |
| C | 0.00000000 | 0.00000000 | 0.67533829   |
| C | 0.00000000 | 0.00000000 | 1.88839453   |
| C | 0.00000000 | 0.00000000 | 3.23918120   |
| C | 0.00000000 | 0.00000000 | 4.45220483   |
| C | 0.00000000 | 0.00000000 | 5.80311080   |
| C | 0.00000000 | 0.00000000 | 7.01603697   |
| C | 0.00000000 | 0.00000000 | 8.36725647   |
| C | 0.00000000 | 0.00000000 | 9.57991217   |
| C | 0.00000000 | 0.00000000 | 10.93194703  |
| C | 0.00000000 | 0.00000000 | 12.14383320  |
| C | 0.00000000 | 0.00000000 | 13.49818670  |
| C | 0.00000000 | 0.00000000 | 14.70772364  |
| C | 0.00000000 | 0.00000000 | 16.07066838  |
| C | 0.00000000 | 0.00000000 | 17.27236668  |
| H | 0.00000000 | 0.00000000 | 18.33643545  |

---

---

|   |            |            |              |
|---|------------|------------|--------------|
| H | 0.00000000 | 0.00000000 | -18.33627463 |
|---|------------|------------|--------------|

---

**Table S2** Calculated polarizability of the carbon chains H-(C≡C)<sub>n</sub>-H (*n* = 3-15) in the zero-frequency limit ( $\lambda = \infty$  nm) and in the frequency-dependent fields ( $\lambda = 1907$ , 1460, 1340, and 1064 nm) at the  $\omega$ B97XD/LPol-ds level

|                         | Incident wavelength<br>( $\lambda$ , in nm) | $\alpha_{\text{iso}}(\lambda)$<br>(in $10^{-23}$ esu) | $\alpha_{\text{xx}}(\lambda) = \alpha_{\text{yy}}(\lambda)$<br>(in $10^{-23}$ esu) | $\alpha_{\text{zz}}(\lambda)$<br>(in $10^{-23}$ esu) |
|-------------------------|---------------------------------------------|-------------------------------------------------------|------------------------------------------------------------------------------------|------------------------------------------------------|
| H-(C≡C) <sub>3</sub> -H | $\infty$                                    | 1.242                                                 | 0.616                                                                              | 2.494                                                |
|                         | 1907                                        | 1.250                                                 | 0.618                                                                              | 2.514                                                |
|                         | 1460                                        | 1.255                                                 | 0.619                                                                              | 2.527                                                |
|                         | 1340                                        | 1.257                                                 | 0.619                                                                              | 2.534                                                |
|                         | 1064                                        | 1.266                                                 | 0.621                                                                              | 2.557                                                |
| H-(C≡C) <sub>4</sub> -H | $\infty$                                    | 1.903                                                 | 0.779                                                                              | 4.153                                                |
|                         | 1907                                        | 1.919                                                 | 0.780                                                                              | 4.195                                                |
|                         | 1460                                        | 1.930                                                 | 0.782                                                                              | 4.225                                                |
|                         | 1340                                        | 1.935                                                 | 0.782                                                                              | 4.239                                                |
|                         | 1064                                        | 1.953                                                 | 0.784                                                                              | 4.292                                                |
| H-(C≡C) <sub>5</sub> -H | $\infty$                                    | 2.697                                                 | 0.941                                                                              | 6.208                                                |
|                         | 1907                                        | 2.724                                                 | 0.943                                                                              | 6.286                                                |
|                         | 1460                                        | 2.744                                                 | 0.944                                                                              | 6.343                                                |
|                         | 1340                                        | 2.753                                                 | 0.945                                                                              | 6.369                                                |
|                         | 1064                                        | 2.788                                                 | 0.947                                                                              | 6.468                                                |
| H-(C≡C) <sub>6</sub> -H | $\infty$                                    | 3.609                                                 | 1.103                                                                              | 8.620                                                |
|                         | 1907                                        | 3.653                                                 | 1.105                                                                              | 8.750                                                |
|                         | 1460                                        | 3.686                                                 | 1.107                                                                              | 8.844                                                |
|                         | 1340                                        | 3.701                                                 | 1.108                                                                              | 8.887                                                |
|                         | 1064                                        | 3.758                                                 | 1.110                                                                              | 9.052                                                |
| H-(C≡C) <sub>7</sub> -H | $\infty$                                    | 4.624                                                 | 1.265                                                                              | 11.340                                               |
|                         | 1907                                        | 4.691                                                 | 1.268                                                                              | 11.540                                               |
|                         | 1460                                        | 4.740                                                 | 1.269                                                                              | 11.680                                               |
|                         | 1340                                        | 4.763                                                 | 1.270                                                                              | 11.750                                               |
|                         | 1064                                        | 4.849                                                 | 1.273                                                                              | 12.000                                               |
| H-(C≡C) <sub>8</sub> -H | $\infty$                                    | 5.728                                                 | 1.427                                                                              | 14.330                                               |
|                         | 1907                                        | 5.823                                                 | 1.430                                                                              | 14.610                                               |

|                                   |          |        |       |        |
|-----------------------------------|----------|--------|-------|--------|
|                                   | 1460     | 5.892  | 1.432 | 14.810 |
|                                   | 1340     | 5.924  | 1.433 | 14.910 |
|                                   | 1064     | 6.047  | 1.436 | 15.270 |
|                                   | $\infty$ | 6.900  | 1.589 | 17.520 |
|                                   | 1907     | 7.027  | 1.592 | 17.900 |
| H-(C $\equiv$ C) <sub>9</sub> -H  | 1460     | 7.120  | 1.594 | 18.170 |
|                                   | 1340     | 7.164  | 1.595 | 18.300 |
|                                   | 1064     | 7.330  | 1.599 | 18.790 |
|                                   | $\infty$ | 8.143  | 1.751 | 20.930 |
|                                   | 1907     | 8.307  | 1.754 | 21.410 |
| H-(C $\equiv$ C) <sub>10</sub> -H | 1460     | 8.428  | 1.757 | 21.770 |
|                                   | 1340     | 8.484  | 1.758 | 21.940 |
|                                   | 1064     | 8.701  | 1.762 | 22.580 |
|                                   | $\infty$ | 9.429  | 1.913 | 24.460 |
|                                   | 1907     | 9.635  | 1.917 | 25.070 |
| H-(C $\equiv$ C) <sub>11</sub> -H | 1460     | 9.786  | 1.919 | 25.520 |
|                                   | 1340     | 9.857  | 1.920 | 25.730 |
|                                   | 1064     | 10.130 | 1.925 | 26.540 |
|                                   | $\infty$ | 10.760 | 2.075 | 28.120 |
|                                   | 1907     | 11.010 | 2.079 | 28.860 |
| H-(C $\equiv$ C) <sub>12</sub> -H | 1460     | 11.190 | 2.082 | 29.410 |
|                                   | 1340     | 11.280 | 2.083 | 29.670 |
|                                   | 1064     | 11.610 | 2.088 | 30.660 |
|                                   | $\infty$ | 12.120 | 2.237 | 31.880 |
|                                   | 1907     | 12.410 | 2.241 | 32.760 |
| H-(C $\equiv$ C) <sub>13</sub> -H | 1460     | 12.640 | 2.244 | 33.420 |
|                                   | 1340     | 12.740 | 2.246 | 33.720 |
|                                   | 1064     | 13.140 | 2.251 | 34.920 |
|                                   | $\infty$ | 13.500 | 2.398 | 35.710 |
|                                   | 1907     | 13.850 | 2.403 | 36.740 |
| H-(C $\equiv$ C) <sub>14</sub> -H | 1460     | 14.110 | 2.406 | 37.510 |
|                                   | 1340     | 14.230 | 2.408 | 37.870 |
|                                   | 1064     | 14.700 | 2.414 | 39.280 |

|                                   |          |        |       |        |
|-----------------------------------|----------|--------|-------|--------|
|                                   | $\infty$ | 14.910 | 2.560 | 39.620 |
|                                   | 1907     | 15.310 | 2.565 | 40.810 |
| H-(C $\equiv$ C) <sub>15</sub> -H | 1460     | 15.610 | 2.569 | 41.700 |
|                                   | 1340     | 15.750 | 2.571 | 42.110 |
|                                   | 1064     | 16.300 | 2.577 | 43.740 |

**Table S3** Calculated second hyperpolarizability of the carbon chains H-(C≡C)<sub>n</sub>-H (*n* = 3-15) in the zero-frequency limit ( $\lambda = \infty$  nm) and in the frequency-dependent fields ( $\lambda = 1907, 1460, 1340,$  and  $1064$  nm) at the  $\omega$ B97XD/LPol-ds level

|                         | Incident wavelength<br>( $\lambda$ , in nm) | $\gamma_{  }(\lambda)$<br>(in $10^{-34}$ esu) | $\gamma_{xxxx}(\lambda) = \gamma_{yyyy}(\lambda)$<br>(in $10^{-34}$ esu) | $\gamma_{zzzz}(\lambda)$<br>(in $10^{-34}$ esu) |
|-------------------------|---------------------------------------------|-----------------------------------------------|--------------------------------------------------------------------------|-------------------------------------------------|
| H-(C≡C) <sub>3</sub> -H | $\infty$                                    | 0.154                                         | 0.045                                                                    | 0.473                                           |
|                         | 1907                                        | 0.164                                         | 0.047                                                                    | 0.508                                           |
|                         | 1460                                        | 0.172                                         | 0.048                                                                    | 0.534                                           |
|                         | 1340                                        | 0.176                                         | 0.049                                                                    | 0.547                                           |
|                         | 1064                                        | 0.191                                         | 0.052                                                                    | 0.598                                           |
| H-(C≡C) <sub>4</sub> -H | $\infty$                                    | 0.366                                         | 0.052                                                                    | 1.438                                           |
|                         | 1907                                        | 0.397                                         | 0.054                                                                    | 1.569                                           |
|                         | 1460                                        | 0.421                                         | 0.056                                                                    | 1.672                                           |
|                         | 1340                                        | 0.433                                         | 0.056                                                                    | 1.721                                           |
|                         | 1064                                        | 0.481                                         | 0.059                                                                    | 1.926                                           |
| H-(C≡C) <sub>5</sub> -H | $\infty$                                    | 0.822                                         | 0.058                                                                    | 3.625                                           |
|                         | 1907                                        | 0.909                                         | 0.060                                                                    | 4.028                                           |
|                         | 1460                                        | 0.979                                         | 0.062                                                                    | 4.353                                           |
|                         | 1340                                        | 1.013                                         | 0.063                                                                    | 4.512                                           |
|                         | 1064                                        | 1.157                                         | 0.066                                                                    | 5.183                                           |
| H-(C≡C) <sub>6</sub> -H | $\infty$                                    | 1.694                                         | 0.066                                                                    | 7.890                                           |
|                         | 1907                                        | 1.911                                         | 0.069                                                                    | 8.935                                           |
|                         | 1460                                        | 2.089                                         | 0.070                                                                    | 9.796                                           |
|                         | 1340                                        | 2.178                                         | 0.071                                                                    | 10.220                                          |
|                         | 1064                                        | 2.561                                         | 0.075                                                                    | 12.080                                          |
| H-(C≡C) <sub>7</sub> -H | $\infty$                                    | 3.182                                         | 0.070                                                                    | 15.250                                          |
|                         | 1907                                        | 3.660                                         | 0.072                                                                    | 17.590                                          |
|                         | 1460                                        | 4.063                                         | 0.074                                                                    | 19.560                                          |
|                         | 1340                                        | 4.266                                         | 0.075                                                                    | 20.560                                          |
|                         | 1064                                        | 5.167                                         | 0.079                                                                    | 24.980                                          |
| H-(C≡C) <sub>8</sub> -H | $\infty$                                    | 5.495                                         | 0.080                                                                    | 26.710                                          |
|                         | 1907                                        | 6.436                                         | 0.083                                                                    | 31.360                                          |

|                                   |          |         |       |         |
|-----------------------------------|----------|---------|-------|---------|
|                                   | 1460     | 7.246   | 0.085 | 35.360  |
|                                   | 1340     | 7.661   | 0.086 | 37.410  |
|                                   | 1064     | 9.548   | 0.090 | 46.750  |
|                                   | $\infty$ | 8.798   | 0.087 | 43.140  |
|                                   | 1907     | 10.480  | 0.090 | 51.470  |
| H-(C $\equiv$ C) <sub>9</sub> -H  | 1460     | 11.950  | 0.093 | 58.790  |
|                                   | 1340     | 12.720  | 0.094 | 62.590  |
|                                   | 1064     | 16.290  | 0.098 | 80.320  |
|                                   | $\infty$ | 13.260  | 0.094 | 65.350  |
|                                   | 1907     | 16.030  | 0.098 | 79.160  |
| H-(C $\equiv$ C) <sub>10</sub> -H | 1460     | 18.520  | 0.100 | 91.520  |
|                                   | 1340     | 19.830  | 0.101 | 98.030  |
|                                   | 1064     | 26.070  | 0.106 | 129.100 |
|                                   | $\infty$ | 18.930  | 0.106 | 93.590  |
|                                   | 1907     | 23.210  | 0.110 | 114.900 |
| H-(C $\equiv$ C) <sub>11</sub> -H | 1460     | 27.110  | 0.112 | 134.300 |
|                                   | 1340     | 29.190  | 0.114 | 144.700 |
|                                   | 1064     | 39.320  | 0.119 | 195.200 |
|                                   | $\infty$ | 25.830  | 0.109 | 128.000 |
|                                   | 1907     | 32.070  | 0.113 | 159.200 |
| H-(C $\equiv$ C) <sub>12</sub> -H | 1460     | 37.860  | 0.115 | 188.000 |
|                                   | 1340     | 40.970  | 0.117 | 203.500 |
|                                   | 1064     | 56.450  | 0.122 | 280.700 |
|                                   | $\infty$ | 33.960  | 0.116 | 168.600 |
|                                   | 1907     | 42.650  | 0.120 | 211.900 |
| H-(C $\equiv$ C) <sub>13</sub> -H | 1460     | 50.810  | 0.123 | 252.600 |
|                                   | 1340     | 55.240  | 0.124 | 274.800 |
|                                   | 1064     | 77.720  | 0.129 | 386.900 |
|                                   | $\infty$ | 43.290  | 0.123 | 215.100 |
|                                   | 1907     | 54.910  | 0.127 | 273.100 |
| H-(C $\equiv$ C) <sub>14</sub> -H | 1460     | 65.970  | 0.130 | 328.300 |
|                                   | 1340     | 72.030  | 0.132 | 358.600 |
|                                   | 1064     | 103.300 | 0.137 | 514.800 |

|                                   |          |         |       |         |
|-----------------------------------|----------|---------|-------|---------|
|                                   | $\infty$ | 53.670  | 0.129 | 267.000 |
|                                   | 1907     | 68.700  | 0.133 | 342.000 |
| H-(C $\equiv$ C) <sub>15</sub> -H | 1460     | 83.170  | 0.136 | 414.200 |
|                                   | 1340     | 91.180  | 0.138 | 454.200 |
|                                   | 1064     | 133.200 | 0.144 | 663.800 |



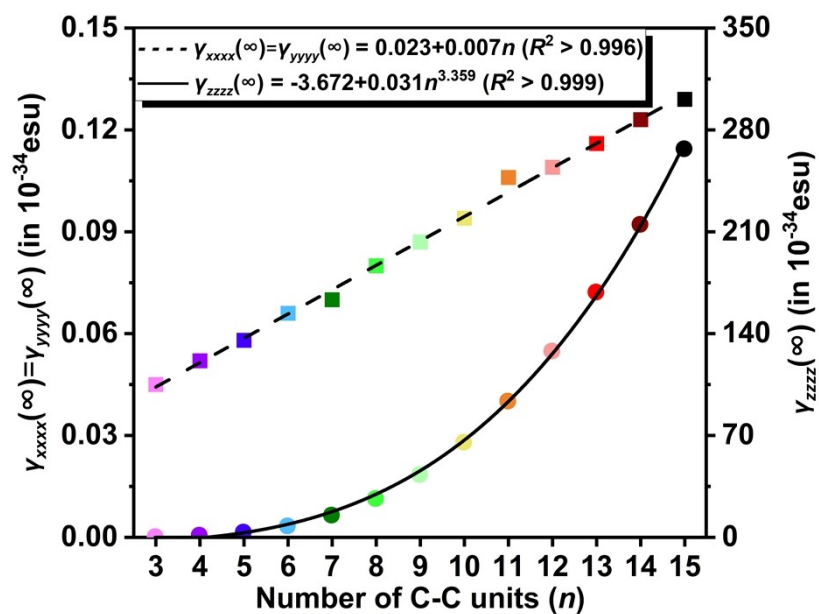

**Fig. S1** Static second hyperpolarizability tensors as a function of the number of C-C units ( $n$ ) in the carbon chains at the  $\omega$ B97XD/LPol-ds level.

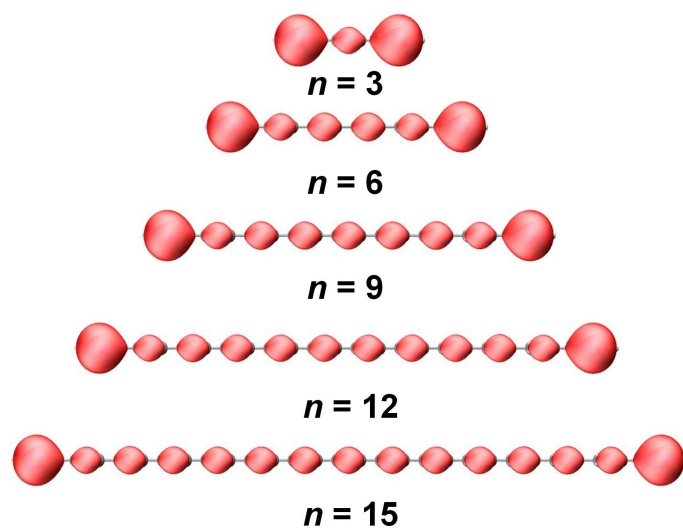

**Fig. S2** Hyperpolarizability density  $-x^{(3)}_{xxx}(\vec{r})$  isosurfaces (isovalue = 10 au) of the carbon chains  $\text{H}-(\text{C}\equiv\text{C})_n-\text{H}$  ( $n = 3, 6, 9, 12,$  and  $15$ ) at the  $\omega\text{B97XD/LP01-ds}$  level. Red and blue regions denote positive and negative spatial contributions, respectively.

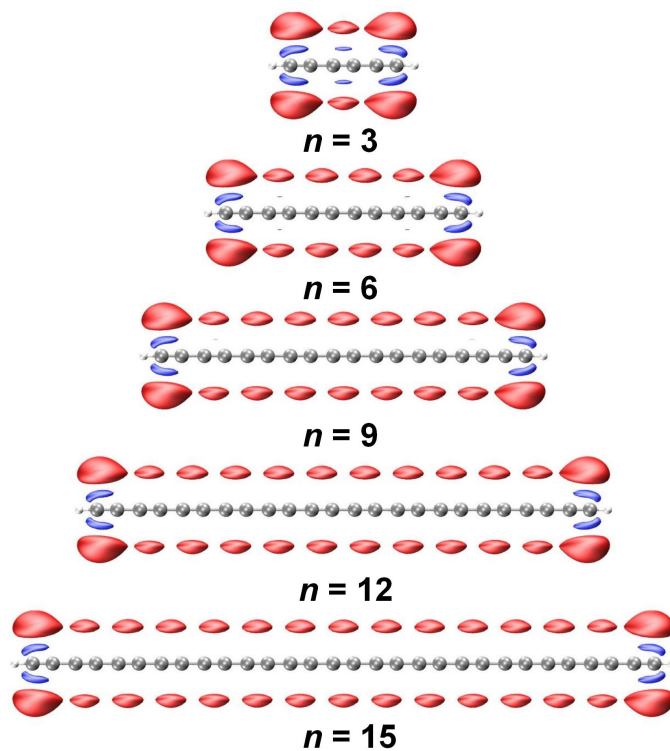

**Fig. S3** Hyperpolarizability density  $-y^{(3)}_{yyy}(\vec{r})$  isosurfaces (isovalue = 10 au) of the carbon chains  $\text{H}-(\text{C}\equiv\text{C})_n-\text{H}$  ( $n = 3, 6, 9, 12,$  and  $15$ ) at the  $\omega\text{B97XD/LP01-ds}$  level. Red and blue regions denote positive and negative spatial contributions, respectively.

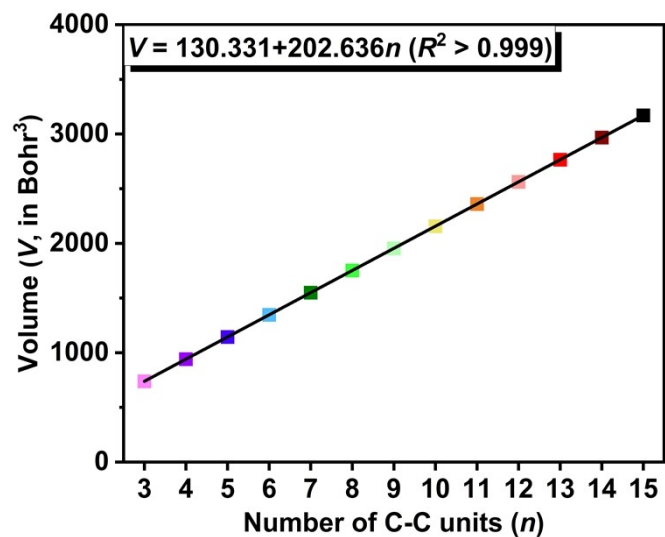

**Fig. S4** Volumes of the carbon chains  $\text{H}-(\text{C}\equiv\text{C})_n-\text{H}$  ( $n = 3-15$ ) as a function of the number of C-C units in the chains.

**Table S4** Total molecular polarizability [ $\alpha_{\text{iso}}(\lambda)$ ,  $\lambda = \infty, 1907, 1460, 1340,$  and  $1064$  nm] and total second hyperpolarizability [ $\gamma_{\parallel}(\lambda)$ ,  $\lambda = \infty, 1907, 1460, 1340,$  and  $1064$  nm] versus the number of carbon atoms ( $n_C$ ) in carbon chains H-(C $\equiv$ C) $_n$ -H ( $n = 3-15$ ) at the  $\omega$ B97XD/LPol-ds level

|                          | Incident wavelength<br>( $\lambda$ , in nm) | $\alpha_{\text{iso}}(\lambda)/n_C$<br>(in $10^{-23}$ esu) | $\gamma_{\parallel}(\lambda)/n_C$<br>(in $10^{-34}$ esu) |
|--------------------------|---------------------------------------------|-----------------------------------------------------------|----------------------------------------------------------|
| H-(C $\equiv$ C) $_3$ -H | $\infty$                                    | 0.207                                                     | 0.026                                                    |
|                          | 1907                                        | 0.208                                                     | 0.027                                                    |
|                          | 1460                                        | 0.209                                                     | 0.029                                                    |
|                          | 1340                                        | 0.210                                                     | 0.029                                                    |
|                          | 1064                                        | 0.211                                                     | 0.032                                                    |
| H-(C $\equiv$ C) $_4$ -H | $\infty$                                    | 0.238                                                     | 0.046                                                    |
|                          | 1907                                        | 0.240                                                     | 0.050                                                    |
|                          | 1460                                        | 0.241                                                     | 0.053                                                    |
|                          | 1340                                        | 0.242                                                     | 0.054                                                    |
|                          | 1064                                        | 0.244                                                     | 0.060                                                    |
| H-(C $\equiv$ C) $_5$ -H | $\infty$                                    | 0.270                                                     | 0.082                                                    |
|                          | 1907                                        | 0.272                                                     | 0.091                                                    |
|                          | 1460                                        | 0.274                                                     | 0.098                                                    |
|                          | 1340                                        | 0.275                                                     | 0.101                                                    |
|                          | 1064                                        | 0.279                                                     | 0.116                                                    |
| H-(C $\equiv$ C) $_6$ -H | $\infty$                                    | 0.301                                                     | 0.141                                                    |
|                          | 1907                                        | 0.304                                                     | 0.159                                                    |
|                          | 1460                                        | 0.307                                                     | 0.174                                                    |
|                          | 1340                                        | 0.308                                                     | 0.182                                                    |
|                          | 1064                                        | 0.313                                                     | 0.213                                                    |
| H-(C $\equiv$ C) $_7$ -H | $\infty$                                    | 0.330                                                     | 0.227                                                    |
|                          | 1907                                        | 0.335                                                     | 0.261                                                    |
|                          | 1460                                        | 0.339                                                     | 0.290                                                    |
|                          | 1340                                        | 0.340                                                     | 0.305                                                    |
|                          | 1064                                        | 0.346                                                     | 0.369                                                    |
| H-(C $\equiv$ C) $_8$ -H | $\infty$                                    | 0.358                                                     | 0.343                                                    |

|                                   |          |       |       |
|-----------------------------------|----------|-------|-------|
|                                   | 1907     | 0.364 | 0.402 |
|                                   | 1460     | 0.368 | 0.453 |
|                                   | 1340     | 0.370 | 0.479 |
|                                   | 1064     | 0.378 | 0.597 |
|                                   | $\infty$ | 0.383 | 0.489 |
| H-(C $\equiv$ C) <sub>9</sub> -H  | 1907     | 0.390 | 0.582 |
|                                   | 1460     | 0.396 | 0.664 |
|                                   | 1340     | 0.398 | 0.707 |
|                                   | 1064     | 0.407 | 0.905 |
|                                   | $\infty$ | 0.407 | 0.663 |
|                                   | 1907     | 0.415 | 0.802 |
| H-(C $\equiv$ C) <sub>10</sub> -H | 1460     | 0.421 | 0.926 |
|                                   | 1340     | 0.424 | 0.992 |
|                                   | 1064     | 0.435 | 1.303 |
|                                   | $\infty$ | 0.429 | 0.860 |
|                                   | 1907     | 0.438 | 1.055 |
| H-(C $\equiv$ C) <sub>11</sub> -H | 1460     | 0.445 | 1.232 |
|                                   | 1340     | 0.448 | 1.327 |
|                                   | 1064     | 0.460 | 1.787 |
|                                   | $\infty$ | 0.448 | 1.076 |
|                                   | 1907     | 0.459 | 1.336 |
| H-(C $\equiv$ C) <sub>12</sub> -H | 1460     | 0.466 | 1.577 |
|                                   | 1340     | 0.470 | 1.707 |
|                                   | 1064     | 0.484 | 2.352 |
|                                   | $\infty$ | 0.466 | 1.306 |
|                                   | 1907     | 0.478 | 1.640 |
| H-(C $\equiv$ C) <sub>13</sub> -H | 1460     | 0.486 | 1.954 |
|                                   | 1340     | 0.490 | 2.125 |
|                                   | 1064     | 0.505 | 2.989 |
|                                   | $\infty$ | 0.482 | 1.546 |
|                                   | 1907     | 0.495 | 1.961 |
| H-(C $\equiv$ C) <sub>14</sub> -H | 1460     | 0.504 | 2.356 |
|                                   | 1340     | 0.508 | 2.573 |

|                                   |          |       |       |
|-----------------------------------|----------|-------|-------|
| -----                             | 1064     | 0.525 | 3.690 |
| -----                             | $\infty$ | 0.497 | 1.789 |
|                                   | 1907     | 0.510 | 2.290 |
| H-(C $\equiv$ C) <sub>15</sub> -H | 1460     | 0.520 | 2.772 |
|                                   | 1340     | 0.525 | 3.039 |
|                                   | 1064     | 0.543 | 4.439 |

---

**Table S5** Vertical ionization energy (*VIE*) and vertical electron affinity (*VEA*) of the carbon chains H-(C≡C)<sub>*n*</sub>-H (*n* = 3-15) at the ωB97XD/def2-TZVP level

|                          | $E_{[\text{H}-(\text{C}\equiv\text{C})_n-\text{H}]^+}$ | $E_{[\text{H}-(\text{C}\equiv\text{C})_n-\text{H}]}$ | $E_{[\text{H}-(\text{C}\equiv\text{C})_n-\text{H}]^-}$ | <i>VIE</i> | <i>VEA</i> |
|--------------------------|--------------------------------------------------------|------------------------------------------------------|--------------------------------------------------------|------------|------------|
|                          | (in eV)                                                | (in eV)                                              | (in eV)                                                | (in eV)    | (in eV)    |
| H-(C≡C) <sub>3</sub> -H  | -6239.079                                              | -6248.404                                            | -6248.195                                              | 9.325      | -0.209     |
| H-(C≡C) <sub>4</sub> -H  | -8311.640                                              | -8320.542                                            | -8321.033                                              | 8.902      | 0.490      |
| H-(C≡C) <sub>5</sub> -H  | -10384.068                                             | -10392.685                                           | -10393.658                                             | 8.617      | 0.973      |
| H-(C≡C) <sub>6</sub> -H  | -12456.414                                             | -12464.829                                           | -12466.150                                             | 8.415      | 1.321      |
| H-(C≡C) <sub>7</sub> -H  | -14528.705                                             | -14536.973                                           | -14538.554                                             | 8.268      | 1.581      |
| H-(C≡C) <sub>8</sub> -H  | -16600.958                                             | -16609.117                                           | -16610.898                                             | 8.159      | 1.781      |
| H-(C≡C) <sub>9</sub> -H  | -18673.182                                             | -18681.261                                           | -18683.196                                             | 8.079      | 1.935      |
| H-(C≡C) <sub>10</sub> -H | -20745.389                                             | -20753.405                                           | -20755.466                                             | 8.016      | 2.061      |
| H-(C≡C) <sub>11</sub> -H | -22817.579                                             | -22825.548                                           | -22827.709                                             | 7.969      | 2.161      |
| H-(C≡C) <sub>12</sub> -H | -24889.758                                             | -24897.692                                           | -24899.933                                             | 7.934      | 2.241      |
| H-(C≡C) <sub>13</sub> -H | -26961.928                                             | -26969.835                                           | -26972.142                                             | 7.907      | 2.307      |
| H-(C≡C) <sub>14</sub> -H | -29034.092                                             | -29041.978                                           | -29044.340                                             | 7.887      | 2.361      |
| H-(C≡C) <sub>15</sub> -H | -31106.250                                             | -31114.122                                           | -31116.528                                             | 7.872      | 2.406      |



**Table S6** Calculated polarizability of the carbon chains H-(C≡C)<sub>n</sub>-H (*n* = 3-15) in the zero-frequency limit ( $\lambda = \infty$  nm) and in the frequency-dependent fields ( $\lambda = 1907$ , 1460, 1340, and 1064 nm) at the  $\omega$ B97XD/aug-cc-pVTZ level

|                         | Incident wavelength<br>( $\lambda$ , in nm) | $\alpha_{\text{iso}}(\lambda)$<br>(in $10^{-23}$ esu) | $\alpha_{\text{xx}}(\lambda) = \alpha_{\text{yy}}(\lambda)$<br>(in $10^{-23}$ esu) | $\alpha_{\text{zz}}(\lambda)$<br>(in $10^{-23}$ esu) |
|-------------------------|---------------------------------------------|-------------------------------------------------------|------------------------------------------------------------------------------------|------------------------------------------------------|
| H-(C≡C) <sub>3</sub> -H | $\infty$                                    | 1.243                                                 | 0.616                                                                              | 2.496                                                |
|                         | 1907                                        | 1.250                                                 | 0.617                                                                              | 2.516                                                |
|                         | 1460                                        | 1.255                                                 | 0.618                                                                              | 2.529                                                |
|                         | 1340                                        | 1.258                                                 | 0.619                                                                              | 2.536                                                |
|                         | 1064                                        | 1.267                                                 | 0.620                                                                              | 2.559                                                |
| H-(C≡C) <sub>4</sub> -H | $\infty$                                    | 1.904                                                 | 0.778                                                                              | 4.156                                                |
|                         | 1907                                        | 1.919                                                 | 0.780                                                                              | 4.198                                                |
|                         | 1460                                        | 1.930                                                 | 0.781                                                                              | 4.228                                                |
|                         | 1340                                        | 1.935                                                 | 0.781                                                                              | 4.242                                                |
|                         | 1064                                        | 1.954                                                 | 0.784                                                                              | 4.295                                                |
| H-(C≡C) <sub>5</sub> -H | $\infty$                                    | 2.698                                                 | 0.940                                                                              | 6.212                                                |
|                         | 1907                                        | 2.725                                                 | 0.942                                                                              | 6.291                                                |
|                         | 1460                                        | 2.745                                                 | 0.944                                                                              | 6.347                                                |
|                         | 1340                                        | 2.754                                                 | 0.944                                                                              | 6.373                                                |
|                         | 1064                                        | 2.788                                                 | 0.947                                                                              | 6.472                                                |
| H-(C≡C) <sub>6</sub> -H | $\infty$                                    | 3.610                                                 | 1.102                                                                              | 8.626                                                |
|                         | 1907                                        | 3.655                                                 | 1.104                                                                              | 8.755                                                |
|                         | 1460                                        | 3.687                                                 | 1.106                                                                              | 8.849                                                |
|                         | 1340                                        | 3.702                                                 | 1.107                                                                              | 8.893                                                |
|                         | 1064                                        | 3.759                                                 | 1.109                                                                              | 9.057                                                |
| H-(C≡C) <sub>7</sub> -H | $\infty$                                    | 4.626                                                 | 1.264                                                                              | 11.350                                               |
|                         | 1907                                        | 4.693                                                 | 1.267                                                                              | 11.550                                               |
|                         | 1460                                        | 4.742                                                 | 1.268                                                                              | 11.690                                               |
|                         | 1340                                        | 4.765                                                 | 1.269                                                                              | 11.750                                               |
|                         | 1064                                        | 4.851                                                 | 1.272                                                                              | 12.010                                               |
| H-(C≡C) <sub>8</sub> -H | $\infty$                                    | 5.731                                                 | 1.426                                                                              | 14.340                                               |
|                         | 1907                                        | 5.825                                                 | 1.429                                                                              | 14.620                                               |

|                                   |          |        |       |        |
|-----------------------------------|----------|--------|-------|--------|
|                                   | 1460     | 5.894  | 1.431 | 14.820 |
|                                   | 1340     | 5.926  | 1.432 | 14.920 |
|                                   | 1064     | 6.049  | 1.435 | 15.280 |
|                                   | $\infty$ | 6.904  | 1.588 | 17.540 |
|                                   | 1907     | 7.030  | 1.591 | 17.910 |
| H-(C $\equiv$ C) <sub>9</sub> -H  | 1460     | 7.124  | 1.593 | 18.180 |
|                                   | 1340     | 7.167  | 1.594 | 18.310 |
|                                   | 1064     | 7.333  | 1.598 | 18.800 |
|                                   | $\infty$ | 8.147  | 1.750 | 20.940 |
|                                   | 1907     | 8.311  | 1.753 | 21.430 |
| H-(C $\equiv$ C) <sub>10</sub> -H | 1460     | 8.432  | 1.755 | 21.780 |
|                                   | 1340     | 8.488  | 1.757 | 21.950 |
|                                   | 1064     | 8.704  | 1.761 | 22.590 |
|                                   | $\infty$ | 9.435  | 1.911 | 24.480 |
|                                   | 1907     | 9.640  | 1.915 | 25.090 |
| H-(C $\equiv$ C) <sub>11</sub> -H | 1460     | 9.791  | 1.918 | 25.540 |
|                                   | 1340     | 9.862  | 1.919 | 25.750 |
|                                   | 1064     | 10.130 | 1.924 | 26.560 |
|                                   | $\infty$ | 10.760 | 2.073 | 28.140 |
|                                   | 1907     | 11.010 | 2.077 | 28.880 |
| H-(C $\equiv$ C) <sub>12</sub> -H | 1460     | 11.200 | 2.080 | 29.430 |
|                                   | 1340     | 11.280 | 2.081 | 29.690 |
|                                   | 1064     | 11.620 | 2.086 | 30.680 |
|                                   | $\infty$ | 12.120 | 2.235 | 31.900 |
|                                   | 1907     | 12.420 | 2.239 | 32.790 |
| H-(C $\equiv$ C) <sub>13</sub> -H | 1460     | 12.640 | 2.242 | 33.440 |
|                                   | 1340     | 12.750 | 2.244 | 33.750 |
|                                   | 1064     | 13.150 | 2.249 | 34.940 |
|                                   | $\infty$ | 13.510 | 2.397 | 35.740 |
|                                   | 1907     | 13.860 | 2.401 | 36.780 |
| H-(C $\equiv$ C) <sub>14</sub> -H | 1460     | 14.120 | 2.405 | 37.550 |
|                                   | 1340     | 14.240 | 2.406 | 37.910 |
|                                   | 1064     | 14.710 | 2.412 | 39.310 |

|                                   |          |        |       |        |
|-----------------------------------|----------|--------|-------|--------|
|                                   | $\infty$ | 14.920 | 2.559 | 39.650 |
|                                   | 1907     | 15.320 | 2.563 | 40.840 |
| H-(C $\equiv$ C) <sub>15</sub> -H | 1460     | 15.620 | 2.567 | 41.730 |
|                                   | 1340     | 15.760 | 2.569 | 42.150 |
|                                   | 1064     | 16.310 | 2.575 | 43.770 |

**Table S7** Calculated second hyperpolarizability of the carbon chains H-(C≡C)<sub>n</sub>-H (*n* = 3-15) in the zero-frequency limit ( $\lambda = \infty$  nm) and in the frequency-dependent fields ( $\lambda = 1907, 1460, 1340,$  and  $1064$  nm) at the  $\omega$ B97XD/aug-cc-pVTZ level

|                         | Incident wavelength<br>( $\lambda$ , in nm) | $\gamma_{  }(\lambda)$<br>(in $10^{-34}$ esu) | $\gamma_{xxxx}(\lambda) = \gamma_{yyyy}(\lambda)$<br>(in $10^{-34}$ esu) | $\gamma_{zzzz}(\lambda)$<br>(in $10^{-34}$ esu) |
|-------------------------|---------------------------------------------|-----------------------------------------------|--------------------------------------------------------------------------|-------------------------------------------------|
| H-(C≡C) <sub>3</sub> -H | $\infty$                                    | 0.150                                         | 0.041                                                                    | 0.476                                           |
|                         | 1907                                        | 0.160                                         | 0.043                                                                    | 0.511                                           |
|                         | 1460                                        | 0.168                                         | 0.044                                                                    | 0.538                                           |
|                         | 1340                                        | 0.172                                         | 0.045                                                                    | 0.551                                           |
|                         | 1064                                        | 0.186                                         | 0.047                                                                    | 0.602                                           |
| H-(C≡C) <sub>4</sub> -H | $\infty$                                    | 0.362                                         | 0.048                                                                    | 1.447                                           |
|                         | 1907                                        | 0.393                                         | 0.050                                                                    | 1.579                                           |
|                         | 1460                                        | 0.417                                         | 0.051                                                                    | 1.682                                           |
|                         | 1340                                        | 0.429                                         | 0.052                                                                    | 1.732                                           |
|                         | 1064                                        | 0.476                                         | 0.055                                                                    | 1.937                                           |
| H-(C≡C) <sub>5</sub> -H | $\infty$                                    | 0.819                                         | 0.055                                                                    | 3.639                                           |
|                         | 1907                                        | 0.905                                         | 0.057                                                                    | 4.043                                           |
|                         | 1460                                        | 0.975                                         | 0.059                                                                    | 4.368                                           |
|                         | 1340                                        | 1.009                                         | 0.059                                                                    | 4.527                                           |
|                         | 1064                                        | 1.152                                         | 0.062                                                                    | 5.199                                           |
| H-(C≡C) <sub>6</sub> -H | $\infty$                                    | 1.691                                         | 0.062                                                                    | 7.911                                           |
|                         | 1907                                        | 1.908                                         | 0.064                                                                    | 8.956                                           |
|                         | 1460                                        | 2.086                                         | 0.066                                                                    | 9.817                                           |
|                         | 1340                                        | 2.174                                         | 0.067                                                                    | 10.250                                          |
|                         | 1064                                        | 2.557                                         | 0.070                                                                    | 12.100                                          |
| H-(C≡C) <sub>7</sub> -H | $\infty$                                    | 3.181                                         | 0.069                                                                    | 15.270                                          |
|                         | 1907                                        | 3.658                                         | 0.071                                                                    | 17.610                                          |
|                         | 1460                                        | 4.060                                         | 0.073                                                                    | 19.580                                          |
|                         | 1340                                        | 4.263                                         | 0.074                                                                    | 20.580                                          |
|                         | 1064                                        | 5.161                                         | 0.077                                                                    | 24.990                                          |
| H-(C≡C) <sub>8</sub> -H | $\infty$                                    | 5.494                                         | 0.076                                                                    | 26.750                                          |
|                         | 1907                                        | 6.434                                         | 0.079                                                                    | 31.390                                          |
|                         | 1460                                        | 7.242                                         | 0.080                                                                    | 35.390                                          |

|                          |      |         |       |         |
|--------------------------|------|---------|-------|---------|
|                          | 1340 | 7.656   | 0.081 | 37.430  |
|                          | 1064 | 9.538   | 0.085 | 46.750  |
|                          | ∞    | 8.798   | 0.083 | 43.180  |
|                          | 1907 | 10.480  | 0.086 | 51.500  |
| H-(C≡C) <sub>9</sub> -H  | 1460 | 11.950  | 0.088 | 58.810  |
|                          | 1340 | 12.710  | 0.089 | 62.610  |
|                          | 1064 | 16.280  | 0.093 | 80.300  |
|                          | ∞    | 13.260  | 0.090 | 65.420  |
|                          | 1907 | 16.040  | 0.093 | 79.210  |
| H-(C≡C) <sub>10</sub> -H | 1460 | 18.520  | 0.095 | 91.560  |
|                          | 1340 | 19.820  | 0.096 | 98.050  |
|                          | 1064 | 26.050  | 0.100 | 129.000 |
|                          | ∞    | 18.930  | 0.097 | 93.680  |
|                          | 1907 | 23.210  | 0.100 | 115.000 |
| H-(C≡C) <sub>11</sub> -H | 1460 | 27.110  | 0.102 | 134.400 |
|                          | 1340 | 29.180  | 0.104 | 144.700 |
|                          | 1064 | 39.280  | 0.108 | 195.100 |
|                          | ∞    | 25.850  | 0.104 | 128.200 |
|                          | 1907 | 32.090  | 0.107 | 159.300 |
| H-(C≡C) <sub>12</sub> -H | 1460 | 37.860  | 0.110 | 188.100 |
|                          | 1340 | 40.970  | 0.111 | 203.600 |
|                          | 1064 | 56.410  | 0.116 | 280.600 |
|                          | ∞    | 33.990  | 0.111 | 168.800 |
|                          | 1907 | 42.670  | 0.115 | 212.100 |
| H-(C≡C) <sub>13</sub> -H | 1460 | 50.820  | 0.117 | 252.800 |
|                          | 1340 | 55.250  | 0.118 | 274.900 |
|                          | 1064 | 77.690  | 0.123 | 386.800 |
|                          | ∞    | 43.310  | 0.118 | 215.300 |
|                          | 1907 | 54.920  | 0.122 | 273.200 |
| H-(C≡C) <sub>14</sub> -H | 1460 | 65.960  | 0.125 | 328.400 |
|                          | 1340 | 72.020  | 0.126 | 358.600 |
|                          | 1064 | 103.200 | 0.131 | 514.400 |
| H-(C≡C) <sub>15</sub> -H | ∞    | 53.730  | 0.125 | 267.300 |

|       |      |         |       |         |
|-------|------|---------|-------|---------|
| ----- | 1907 | 68.760  | 0.129 | 342.300 |
|       | 1460 | 83.220  | 0.132 | 414.500 |
|       | 1340 | 91.220  | 0.133 | 454.500 |
|       | 1064 | 133.100 | 0.139 | 663.700 |

**Table S8** Calculated polarizability of the carbon chains H-(C≡C)<sub>n</sub>-H (*n* = 3- 15) in the zero-frequency limit ( $\lambda = \infty$  nm) and in the frequency-dependent fields ( $\lambda = 1907$ , 1460, 1340, and 1064 nm) at the CAM-B3LYP/LPol-ds level

|                         | Incident wavelength<br>( $\lambda$ , in nm) | $\alpha_{\text{iso}}(\lambda)$<br>(in $10^{-23}$ esu) | $\alpha_{\text{xx}}(\lambda) = \alpha_{\text{yy}}(\lambda)$<br>(in $10^{-23}$ esu) | $\alpha_{\text{zz}}(\lambda)$<br>(in $10^{-23}$ esu) |
|-------------------------|---------------------------------------------|-------------------------------------------------------|------------------------------------------------------------------------------------|------------------------------------------------------|
| H-(C≡C) <sub>3</sub> -H | $\infty$                                    | 1.243                                                 | 0.615                                                                              | 2.498                                                |
|                         | 1907                                        | 1.250                                                 | 0.616                                                                              | 2.517                                                |
|                         | 1460                                        | 1.255                                                 | 0.617                                                                              | 2.531                                                |
|                         | 1340                                        | 1.258                                                 | 0.618                                                                              | 2.538                                                |
|                         | 1064                                        | 1.267                                                 | 0.620                                                                              | 2.562                                                |
|                         | -----                                       |                                                       |                                                                                    |                                                      |
| H-(C≡C) <sub>4</sub> -H | $\infty$                                    | 1.906                                                 | 0.777                                                                              | 4.163                                                |
|                         | 1907                                        | 1.921                                                 | 0.779                                                                              | 4.206                                                |
|                         | 1460                                        | 1.932                                                 | 0.780                                                                              | 4.236                                                |
|                         | 1340                                        | 1.937                                                 | 0.780                                                                              | 4.251                                                |
|                         | 1064                                        | 1.956                                                 | 0.782                                                                              | 4.304                                                |
|                         | -----                                       |                                                       |                                                                                    |                                                      |
| H-(C≡C) <sub>5</sub> -H | $\infty$                                    | 2.704                                                 | 0.939                                                                              | 6.235                                                |
|                         | 1907                                        | 2.732                                                 | 0.941                                                                              | 6.314                                                |
|                         | 1460                                        | 2.752                                                 | 0.942                                                                              | 6.372                                                |
|                         | 1340                                        | 2.761                                                 | 0.943                                                                              | 6.399                                                |
|                         | 1064                                        | 2.796                                                 | 0.945                                                                              | 6.499                                                |
|                         | -----                                       |                                                       |                                                                                    |                                                      |
| H-(C≡C) <sub>6</sub> -H | $\infty$                                    | 3.626                                                 | 1.100                                                                              | 8.676                                                |
|                         | 1907                                        | 3.671                                                 | 1.102                                                                              | 8.809                                                |
|                         | 1460                                        | 3.704                                                 | 1.104                                                                              | 8.905                                                |
|                         | 1340                                        | 3.720                                                 | 1.105                                                                              | 8.949                                                |
|                         | 1064                                        | 3.778                                                 | 1.108                                                                              | 9.118                                                |
|                         | -----                                       |                                                       |                                                                                    |                                                      |
| H-(C≡C) <sub>7</sub> -H | $\infty$                                    | 4.656                                                 | 1.262                                                                              | 11.440                                               |
|                         | 1907                                        | 4.725                                                 | 1.264                                                                              | 11.650                                               |
|                         | 1460                                        | 4.775                                                 | 1.266                                                                              | 11.790                                               |
|                         | 1340                                        | 4.798                                                 | 1.267                                                                              | 11.860                                               |
|                         | 1064                                        | 4.887                                                 | 1.270                                                                              | 12.120                                               |
|                         | -----                                       |                                                       |                                                                                    |                                                      |
| H-(C≡C) <sub>8</sub> -H | $\infty$                                    | 5.780                                                 | 1.423                                                                              | 14.490                                               |
|                         | 1907                                        | 5.878                                                 | 1.426                                                                              | 14.780                                               |
| -----                   |                                             |                                                       |                                                                                    |                                                      |

|                                   |          |        |       |        |
|-----------------------------------|----------|--------|-------|--------|
|                                   | 1460     | 5.949  | 1.428 | 14.990 |
|                                   | 1340     | 5.983  | 1.429 | 15.090 |
|                                   | 1064     | 6.110  | 1.432 | 15.460 |
|                                   | $\infty$ | 6.978  | 1.584 | 17.760 |
|                                   | 1907     | 7.110  | 1.587 | 18.150 |
| H-(C $\equiv$ C) <sub>9</sub> -H  | 1460     | 7.207  | 1.590 | 18.440 |
|                                   | 1340     | 7.252  | 1.591 | 18.570 |
|                                   | 1064     | 7.425  | 1.595 | 19.090 |
|                                   | $\infty$ | 8.251  | 1.746 | 21.260 |
|                                   | 1907     | 8.423  | 1.749 | 21.770 |
| H-(C $\equiv$ C) <sub>10</sub> -H | 1460     | 8.550  | 1.752 | 22.150 |
|                                   | 1340     | 8.608  | 1.753 | 22.320 |
|                                   | 1064     | 8.836  | 1.757 | 22.990 |
|                                   | $\infty$ | 9.573  | 1.907 | 24.910 |
|                                   | 1907     | 9.789  | 1.911 | 25.550 |
| H-(C $\equiv$ C) <sub>11</sub> -H | 1460     | 9.949  | 1.914 | 26.020 |
|                                   | 1340     | 10.020 | 1.915 | 26.240 |
|                                   | 1064     | 10.310 | 1.919 | 27.100 |
|                                   | $\infty$ | 10.940 | 2.068 | 28.680 |
|                                   | 1907     | 11.200 | 2.073 | 29.470 |
| H-(C $\equiv$ C) <sub>12</sub> -H | 1460     | 11.400 | 2.076 | 30.050 |
|                                   | 1340     | 11.490 | 2.077 | 30.320 |
|                                   | 1064     | 11.850 | 2.082 | 31.380 |
|                                   | $\infty$ | 12.340 | 2.230 | 32.570 |
|                                   | 1907     | 12.660 | 2.234 | 33.510 |
| H-(C $\equiv$ C) <sub>13</sub> -H | 1460     | 12.890 | 2.237 | 34.210 |
|                                   | 1340     | 13.000 | 2.239 | 34.530 |
|                                   | 1064     | 13.430 | 2.244 | 35.810 |
|                                   | $\infty$ | 13.780 | 2.391 | 36.550 |
|                                   | 1907     | 14.150 | 2.396 | 37.650 |
| H-(C $\equiv$ C) <sub>14</sub> -H | 1460     | 14.420 | 2.399 | 38.470 |
|                                   | 1340     | 14.550 | 2.401 | 38.860 |
|                                   | 1064     | 15.060 | 2.406 | 40.360 |



|                                   |          |        |       |        |
|-----------------------------------|----------|--------|-------|--------|
|                                   | $\infty$ | 15.240 | 2.553 | 40.600 |
|                                   | 1907     | 15.660 | 2.558 | 41.880 |
| H-(C $\equiv$ C) <sub>15</sub> -H | 1460     | 15.980 | 2.561 | 42.830 |
|                                   | 1340     | 16.130 | 2.563 | 43.270 |
|                                   | 1064     | 16.720 | 2.569 | 45.020 |

**Table S9** Calculated second hyperpolarizability of the carbon chains H-(C≡C)<sub>n</sub>-H (*n* = 3-15) in the zero-frequency limit ( $\lambda = \infty$  nm) and in the frequency-dependent fields ( $\lambda = 1907, 1460, 1340,$  and  $1064$  nm) at the CAM-B3LYP/LPol-ds level

|                         | Incident wavelength<br>( $\lambda$ , in nm) | $\gamma_{  }(\lambda)$<br>(in $10^{-34}$ esu) | $\gamma_{xxxx}(\lambda) = \gamma_{yyyy}(\lambda)$<br>(in $10^{-34}$ esu) | $\gamma_{zzzz}(\lambda)$<br>(in $10^{-34}$ esu) |
|-------------------------|---------------------------------------------|-----------------------------------------------|--------------------------------------------------------------------------|-------------------------------------------------|
| H-(C≡C) <sub>3</sub> -H | $\infty$                                    | 0.159                                         | 0.043                                                                    | 0.499                                           |
|                         | 1907                                        | 0.170                                         | 0.045                                                                    | 0.537                                           |
|                         | 1460                                        | 0.179                                         | 0.047                                                                    | 0.566                                           |
|                         | 1340                                        | 0.183                                         | 0.047                                                                    | 0.580                                           |
|                         | 1064                                        | 0.199                                         | 0.050                                                                    | 0.636                                           |
| H-(C≡C) <sub>4</sub> -H | $\infty$                                    | 0.381                                         | 0.049                                                                    | 1.523                                           |
|                         | 1907                                        | 0.415                                         | 0.051                                                                    | 1.666                                           |
|                         | 1460                                        | 0.441                                         | 0.052                                                                    | 1.779                                           |
|                         | 1340                                        | 0.454                                         | 0.053                                                                    | 1.834                                           |
|                         | 1064                                        | 0.506                                         | 0.056                                                                    | 2.060                                           |
| H-(C≡C) <sub>5</sub> -H | $\infty$                                    | 0.872                                         | 0.056                                                                    | 3.876                                           |
|                         | 1907                                        | 0.969                                         | 0.058                                                                    | 4.323                                           |
|                         | 1460                                        | 1.046                                         | 0.060                                                                    | 4.685                                           |
|                         | 1340                                        | 1.084                                         | 0.061                                                                    | 4.863                                           |
|                         | 1064                                        | 1.245                                         | 0.064                                                                    | 5.616                                           |
| H-(C≡C) <sub>6</sub> -H | $\infty$                                    | 1.824                                         | 0.063                                                                    | 8.540                                           |
|                         | 1907                                        | 2.069                                         | 0.065                                                                    | 9.722                                           |
|                         | 1460                                        | 2.271                                         | 0.067                                                                    | 10.700                                          |
|                         | 1340                                        | 2.373                                         | 0.068                                                                    | 11.190                                          |
|                         | 1064                                        | 2.813                                         | 0.071                                                                    | 13.320                                          |
| H-(C≡C) <sub>7</sub> -H | $\infty$                                    | 3.484                                         | 0.069                                                                    | 16.740                                          |
|                         | 1907                                        | 4.036                                         | 0.072                                                                    | 19.450                                          |
|                         | 1460                                        | 4.505                                         | 0.074                                                                    | 21.760                                          |
|                         | 1340                                        | 4.744                                         | 0.075                                                                    | 22.930                                          |
|                         | 1064                                        | 5.811                                         | 0.079                                                                    | 28.170                                          |
| H-(C≡C) <sub>8</sub> -H | $\infty$                                    | 6.105                                         | 0.066                                                                    | 29.790                                          |
|                         | 1907                                        | 7.221                                         | 0.068                                                                    | 35.300                                          |
|                         | 1460                                        | 8.191                                         | 0.070                                                                    | 40.100                                          |

|                          |      |         |       |         |
|--------------------------|------|---------|-------|---------|
|                          | 1340 | 8.693   | 0.071 | 42.580  |
|                          | 1064 | 11.000  | 0.074 | 54.020  |
|                          | ∞    | 9.952   | 0.082 | 48.900  |
|                          | 1907 | 11.990  | 0.086 | 59.030  |
| H-(C≡C) <sub>9</sub> -H  | 1460 | 13.810  | 0.088 | 68.070  |
|                          | 1340 | 14.770  | 0.089 | 72.810  |
|                          | 1064 | 19.290  | 0.093 | 95.300  |
|                          | ∞    | 15.240  | 0.089 | 75.250  |
|                          | 1907 | 18.700  | 0.092 | 92.440  |
| H-(C≡C) <sub>10</sub> -H | 1460 | 21.850  | 0.095 | 108.100 |
|                          | 1340 | 23.530  | 0.096 | 116.500 |
|                          | 1064 | 31.700  | 0.100 | 157.200 |
|                          | ∞    | 22.080  | 0.096 | 109.400 |
|                          | 1907 | 27.540  | 0.099 | 136.500 |
| H-(C≡C) <sub>11</sub> -H | 1460 | 32.610  | 0.102 | 161.800 |
|                          | 1340 | 35.350  | 0.103 | 175.500 |
|                          | 1064 | 49.060  | 0.107 | 243.800 |
|                          | ∞    | 30.570  | 0.103 | 151.700 |
|                          | 1907 | 38.690  | 0.106 | 192.200 |
| H-(C≡C) <sub>12</sub> -H | 1460 | 46.390  | 0.109 | 230.600 |
|                          | 1340 | 50.600  | 0.110 | 251.600 |
|                          | 1064 | 72.190  | 0.115 | 359.300 |
|                          | ∞    | 40.720  | 0.109 | 202.300 |
|                          | 1907 | 52.230  | 0.113 | 259.800 |
| H-(C≡C) <sub>13</sub> -H | 1460 | 63.340  | 0.116 | 315.200 |
|                          | 1340 | 69.490  | 0.118 | 345.900 |
|                          | 1064 | 101.800 | 0.123 | 507.000 |
|                          | ∞    | 52.450  | 0.116 | 260.900 |
|                          | 1907 | 68.110  | 0.120 | 339.100 |
| H-(C≡C) <sub>14</sub> -H | 1460 | 83.460  | 0.123 | 415.700 |
|                          | 1340 | 92.040  | 0.125 | 458.600 |
|                          | 1064 | 138.100 | 0.130 | 688.600 |
| H-(C≡C) <sub>15</sub> -H | ∞    | 65.770  | 0.169 | 327.300 |

|       |      |         |       |         |
|-------|------|---------|-------|---------|
| ----- | 1907 | 86.350  | 0.176 | 430.000 |
|       | 1460 | 106.800 | 0.181 | 532.100 |
|       | 1340 | 118.400 | 0.183 | 589.900 |
|       | 1064 | 181.600 | 0.192 | 906.000 |

---

**Table S10** Calculated polarizability of the carbon chains H-(C≡C)<sub>n</sub>-H (*n* = 3- 15) in

the zero-frequency limit ( $\lambda = \infty$  nm) and in the frequency-dependent fields ( $\lambda = 1907$ , 1460, 1340, and 1064 nm) at the CAM-B3LYP/aug-cc-pVTZ level

|                                  | Incident wavelength<br>( $\lambda$ , in nm) | $\alpha_{\text{iso}}(\lambda)$<br>(in $10^{-23}$ esu) | $\alpha_{\text{xx}}(\lambda) = \alpha_{\text{yy}}(\lambda)$<br>(in $10^{-23}$ esu) | $\alpha_{\text{zz}}(\lambda)$<br>(in $10^{-23}$ esu) |
|----------------------------------|---------------------------------------------|-------------------------------------------------------|------------------------------------------------------------------------------------|------------------------------------------------------|
| H-(C $\equiv$ C) <sub>3</sub> -H | $\infty$                                    | 1.242                                                 | 0.612                                                                              | 2.501                                                |
|                                  | 1907                                        | 1.249                                                 | 0.613                                                                              | 2.520                                                |
|                                  | 1460                                        | 1.254                                                 | 0.614                                                                              | 2.534                                                |
|                                  | 1340                                        | 1.257                                                 | 0.615                                                                              | 2.541                                                |
|                                  | 1064                                        | 1.266                                                 | 0.616                                                                              | 2.565                                                |
| H-(C $\equiv$ C) <sub>4</sub> -H | $\infty$                                    | 1.905                                                 | 0.773                                                                              | 4.168                                                |
|                                  | 1907                                        | 1.920                                                 | 0.775                                                                              | 4.211                                                |
|                                  | 1460                                        | 1.931                                                 | 0.776                                                                              | 4.242                                                |
|                                  | 1340                                        | 1.936                                                 | 0.777                                                                              | 4.256                                                |
|                                  | 1064                                        | 1.956                                                 | 0.779                                                                              | 4.309                                                |
| H-(C $\equiv$ C) <sub>5</sub> -H | $\infty$                                    | 2.704                                                 | 0.935                                                                              | 6.243                                                |
|                                  | 1907                                        | 2.732                                                 | 0.937                                                                              | 6.322                                                |
|                                  | 1460                                        | 2.752                                                 | 0.938                                                                              | 6.380                                                |
|                                  | 1340                                        | 2.761                                                 | 0.939                                                                              | 6.407                                                |
|                                  | 1064                                        | 2.796                                                 | 0.941                                                                              | 6.507                                                |
| H-(C $\equiv$ C) <sub>6</sub> -H | $\infty$                                    | 3.627                                                 | 1.096                                                                              | 8.688                                                |
|                                  | 1907                                        | 3.672                                                 | 1.098                                                                              | 8.820                                                |
|                                  | 1460                                        | 3.705                                                 | 1.100                                                                              | 8.916                                                |
|                                  | 1340                                        | 3.720                                                 | 1.100                                                                              | 8.961                                                |
|                                  | 1064                                        | 3.779                                                 | 1.103                                                                              | 9.129                                                |
| H-(C $\equiv$ C) <sub>7</sub> -H | $\infty$                                    | 4.658                                                 | 1.257                                                                              | 11.460                                               |
|                                  | 1907                                        | 4.727                                                 | 1.259                                                                              | 11.662                                               |
|                                  | 1460                                        | 4.777                                                 | 1.261                                                                              | 11.809                                               |
|                                  | 1340                                        | 4.800                                                 | 1.262                                                                              | 11.877                                               |
|                                  | 1064                                        | 4.889                                                 | 1.265                                                                              | 12.137                                               |
| H-(C $\equiv$ C) <sub>8</sub> -H | $\infty$                                    | 5.783                                                 | 1.418                                                                              | 14.514                                               |
|                                  | 1907                                        | 5.881                                                 | 1.421                                                                              | 14.802                                               |
|                                  | 1460                                        | 5.953                                                 | 1.423                                                                              | 15.013                                               |

|                                   |          |        |       |        |
|-----------------------------------|----------|--------|-------|--------|
|                                   | 1340     | 5.986  | 1.424 | 15.111 |
|                                   | 1064     | 6.113  | 1.427 | 15.486 |
|                                   | $\infty$ | 6.983  | 1.579 | 17.791 |
|                                   | 1907     | 7.115  | 1.582 | 18.181 |
| H-(C $\equiv$ C) <sub>9</sub> -H  | 1460     | 7.212  | 1.584 | 18.468 |
|                                   | 1340     | 7.257  | 1.585 | 18.601 |
|                                   | 1064     | 7.430  | 1.589 | 19.113 |
|                                   | $\infty$ | 8.258  | 1.740 | 21.296 |
|                                   | 1907     | 8.430  | 1.743 | 21.804 |
| H-(C $\equiv$ C) <sub>10</sub> -H | 1460     | 8.557  | 1.746 | 22.179 |
|                                   | 1340     | 8.616  | 1.747 | 22.354 |
|                                   | 1064     | 8.843  | 1.751 | 23.028 |
|                                   | $\infty$ | 9.583  | 1.901 | 24.948 |
|                                   | 1907     | 9.799  | 1.905 | 25.588 |
| H-(C $\equiv$ C) <sub>11</sub> -H | 1460     | 9.959  | 1.907 | 26.062 |
|                                   | 1340     | 10.033 | 1.908 | 26.282 |
|                                   | 1064     | 10.321 | 1.913 | 27.138 |
|                                   | $\infty$ | 10.953 | 2.062 | 28.735 |
|                                   | 1907     | 11.217 | 2.066 | 29.519 |
| H-(C $\equiv$ C) <sub>12</sub> -H | 1460     | 11.413 | 2.069 | 30.101 |
|                                   | 1340     | 11.504 | 2.070 | 30.372 |
|                                   | 1064     | 11.859 | 2.075 | 31.429 |
|                                   | $\infty$ | 12.359 | 2.223 | 32.632 |
|                                   | 1907     | 12.675 | 2.227 | 33.571 |
| H-(C $\equiv$ C) <sub>13</sub> -H | 1460     | 12.910 | 2.230 | 34.269 |
|                                   | 1340     | 13.020 | 2.231 | 34.596 |
|                                   | 1064     | 13.448 | 2.237 | 35.869 |
|                                   | $\infty$ | 13.795 | 2.384 | 36.617 |
|                                   | 1907     | 14.166 | 2.388 | 37.720 |
| H-(C $\equiv$ C) <sub>14</sub> -H | 1460     | 14.442 | 2.392 | 38.543 |
|                                   | 1340     | 14.571 | 2.393 | 38.928 |
|                                   | 1064     | 15.077 | 2.399 | 40.434 |
| H-(C $\equiv$ C) <sub>15</sub> -H | $\infty$ | 15.256 | 2.545 | 40.680 |

|       |      |        |       |        |
|-------|------|--------|-------|--------|
| ----- | 1907 | 15.685 | 2.550 | 41.955 |
|       | 1460 | 16.005 | 2.553 | 42.909 |
|       | 1340 | 16.155 | 2.555 | 43.355 |
|       | 1064 | 16.742 | 2.560 | 45.106 |

**Table S11** Calculated second hyperpolarizability of the carbon chains H-(C≡C)<sub>n</sub>-H (*n* = 3-15) in the zero-frequency limit ( $\lambda = \infty$  nm) and in the frequency-dependent fields ( $\lambda = 1907, 1460, 1340,$  and  $1064$  nm) at the CAM-B3LYP/aug-cc-pVTZ level

|                         | Incident wavelength<br>( $\lambda$ , in nm) | $\gamma_{  }(\lambda)$<br>(in $10^{-34}$ esu) | $\gamma_{xxxx}(\lambda) = \gamma_{yyyy}(\lambda)$<br>(in $10^{-34}$ esu) | $\gamma_{zzzz}(\lambda)$<br>(in $10^{-34}$ esu) |
|-------------------------|---------------------------------------------|-----------------------------------------------|--------------------------------------------------------------------------|-------------------------------------------------|
| H-(C≡C) <sub>3</sub> -H | $\infty$                                    | 0.152                                         | 0.038                                                                    | 0.498                                           |
|                         | 1907                                        | 0.163                                         | 0.040                                                                    | 0.535                                           |
|                         | 1460                                        | 0.171                                         | 0.041                                                                    | 0.564                                           |
|                         | 1340                                        | 0.175                                         | 0.041                                                                    | 0.578                                           |
|                         | 1064                                        | 0.190                                         | 0.044                                                                    | 0.634                                           |
| H-(C≡C) <sub>4</sub> -H | $\infty$                                    | 0.375                                         | 0.044                                                                    | 1.525                                           |
|                         | 1907                                        | 0.408                                         | 0.046                                                                    | 1.668                                           |
|                         | 1460                                        | 0.434                                         | 0.048                                                                    | 1.781                                           |
|                         | 1340                                        | 0.447                                         | 0.048                                                                    | 1.836                                           |
|                         | 1064                                        | 0.499                                         | 0.051                                                                    | 2.062                                           |
| H-(C≡C) <sub>5</sub> -H | $\infty$                                    | 0.863                                         | 0.051                                                                    | 3.874                                           |
|                         | 1907                                        | 0.958                                         | 0.053                                                                    | 4.321                                           |
|                         | 1460                                        | 1.035                                         | 0.054                                                                    | 4.682                                           |
|                         | 1340                                        | 1.073                                         | 0.055                                                                    | 4.860                                           |
|                         | 1064                                        | 1.232                                         | 0.057                                                                    | 5.611                                           |
| H-(C≡C) <sub>6</sub> -H | $\infty$                                    | 1.813                                         | 0.057                                                                    | 8.537                                           |
|                         | 1907                                        | 2.056                                         | 0.059                                                                    | 9.716                                           |
|                         | 1460                                        | 2.258                                         | 0.061                                                                    | 10.694                                          |
|                         | 1340                                        | 2.359                                         | 0.061                                                                    | 11.183                                          |
|                         | 1064                                        | 2.796                                         | 0.064                                                                    | 13.309                                          |
| H-(C≡C) <sub>7</sub> -H | $\infty$                                    | 3.470                                         | 0.063                                                                    | 16.733                                          |
|                         | 1907                                        | 4.020                                         | 0.065                                                                    | 19.436                                          |
|                         | 1460                                        | 4.487                                         | 0.067                                                                    | 21.735                                          |
|                         | 1340                                        | 4.724                                         | 0.068                                                                    | 22.902                                          |
|                         | 1064                                        | 5.786                                         | 0.071                                                                    | 28.133                                          |
| H-(C≡C) <sub>8</sub> -H | $\infty$                                    | 6.098                                         | 0.069                                                                    | 29.790                                          |
|                         | 1907                                        | 7.210                                         | 0.072                                                                    | 35.291                                          |
|                         | 1460                                        | 8.178                                         | 0.074                                                                    | 40.084                                          |



|                                   |          |         |       |         |
|-----------------------------------|----------|---------|-------|---------|
|                                   | 1340     | 8.678   | 0.075 | 42.560  |
|                                   | 1064     | 10.980  | 0.078 | 53.971  |
|                                   | $\infty$ | 9.938   | 0.076 | 48.900  |
|                                   | 1907     | 11.974  | 0.078 | 59.013  |
| H-(C $\equiv$ C) <sub>9</sub> -H  | 1460     | 13.789  | 0.080 | 68.033  |
|                                   | 1340     | 14.741  | 0.081 | 72.765  |
|                                   | 1064     | 19.251  | 0.085 | 95.192  |
|                                   | $\infty$ | 15.229  | 0.082 | 75.267  |
|                                   | 1907     | 18.679  | 0.085 | 92.440  |
| H-(C $\equiv$ C) <sub>10</sub> -H | 1460     | 21.824  | 0.087 | 108.100 |
|                                   | 1340     | 23.498  | 0.088 | 116.439 |
|                                   | 1064     | 31.652  | 0.092 | 157.060 |
|                                   | $\infty$ | 22.079  | 0.088 | 109.432 |
|                                   | 1907     | 27.525  | 0.091 | 136.575 |
| H-(C $\equiv$ C) <sub>11</sub> -H | 1460     | 32.592  | 0.093 | 161.834 |
|                                   | 1340     | 35.328  | 0.095 | 175.473 |
|                                   | 1064     | 49.000  | 0.099 | 243.662 |
|                                   | $\infty$ | 30.579  | 0.095 | 151.849 |
|                                   | 1907     | 38.692  | 0.098 | 192.314 |
| H-(C $\equiv$ C) <sub>12</sub> -H | 1460     | 46.384  | 0.100 | 230.684 |
|                                   | 1340     | 50.590  | 0.101 | 251.669 |
|                                   | 1064     | 72.139  | 0.105 | 359.215 |
|                                   | $\infty$ | 40.740  | 0.101 | 202.569 |
|                                   | 1907     | 52.249  | 0.104 | 259.999 |
| H-(C $\equiv$ C) <sub>13</sub> -H | 1460     | 63.347  | 0.107 | 315.394 |
|                                   | 1340     | 69.489  | 0.108 | 346.052 |
|                                   | 1064     | 101.701 | 0.112 | 506.878 |
|                                   | $\infty$ | 52.520  | 0.107 | 261.387 |
|                                   | 1907     | 68.183  | 0.111 | 339.573 |
| H-(C $\equiv$ C) <sub>14</sub> -H | 1460     | 83.525  | 0.113 | 416.174 |
|                                   | 1340     | 92.108  | 0.115 | 459.032 |
|                                   | 1064     | 138.121 | 0.119 | 688.829 |
| H-(C $\equiv$ C) <sub>15</sub> -H | $\infty$ | 65.853  | 0.114 | 327.967 |

|       |      |         |       |         |
|-------|------|---------|-------|---------|
| ----- | 1907 | 86.439  | 0.117 | 430.756 |
|       | 1460 | 106.893 | 0.120 | 532.903 |
|       | 1340 | 118.451 | 0.121 | 590.629 |
|       | 1064 | 181.693 | 0.126 | 906.541 |

---

**Table S12** Calculated polarizability of the carbon chains H-(C≡C)<sub>n</sub>-H (*n* = 3- 15) in

the zero-frequency limit ( $\lambda = \infty$  nm) and in the frequency-dependent fields ( $\lambda = 1907$ , 1460, 1340, and 1064 nm) at the PBE38/LPol-ds level

|                                  | Incident wavelength<br>( $\lambda$ , in nm) | $\alpha_{\text{iso}}(\lambda)$<br>(in $10^{-23}$ esu) | $\alpha_{\text{xx}}(\lambda) = \alpha_{\text{yy}}(\lambda)$<br>(in $10^{-23}$ esu) | $\alpha_{\text{zz}}(\lambda)$<br>(in $10^{-23}$ esu) |
|----------------------------------|---------------------------------------------|-------------------------------------------------------|------------------------------------------------------------------------------------|------------------------------------------------------|
| H-(C $\equiv$ C) <sub>3</sub> -H | $\infty$                                    | 1.246                                                 | 0.606                                                                              | 2.524                                                |
|                                  | 1907                                        | 1.253                                                 | 0.607                                                                              | 2.544                                                |
|                                  | 1460                                        | 1.258                                                 | 0.608                                                                              | 2.558                                                |
|                                  | 1340                                        | 1.261                                                 | 0.609                                                                              | 2.565                                                |
|                                  | 1064                                        | 1.270                                                 | 0.610                                                                              | 2.589                                                |
| H-(C $\equiv$ C) <sub>4</sub> -H | $\infty$                                    | 1.928                                                 | 0.766                                                                              | 4.252                                                |
|                                  | 1907                                        | 1.944                                                 | 0.768                                                                              | 4.297                                                |
|                                  | 1460                                        | 1.956                                                 | 0.769                                                                              | 4.329                                                |
|                                  | 1340                                        | 1.961                                                 | 0.769                                                                              | 4.343                                                |
|                                  | 1064                                        | 1.981                                                 | 0.771                                                                              | 4.399                                                |
| H-(C $\equiv$ C) <sub>5</sub> -H | $\infty$                                    | 2.762                                                 | 0.926                                                                              | 6.435                                                |
|                                  | 1907                                        | 2.792                                                 | 0.928                                                                              | 6.520                                                |
|                                  | 1460                                        | 2.813                                                 | 0.929                                                                              | 6.582                                                |
|                                  | 1340                                        | 2.823                                                 | 0.930                                                                              | 6.610                                                |
|                                  | 1064                                        | 2.860                                                 | 0.932                                                                              | 6.717                                                |
| H-(C $\equiv$ C) <sub>6</sub> -H | $\infty$                                    | 3.739                                                 | 1.085                                                                              | 9.046                                                |
|                                  | 1907                                        | 3.789                                                 | 1.088                                                                              | 9.191                                                |
|                                  | 1460                                        | 3.825                                                 | 1.089                                                                              | 9.296                                                |
|                                  | 1340                                        | 3.841                                                 | 1.090                                                                              | 9.345                                                |
|                                  | 1064                                        | 3.905                                                 | 1.093                                                                              | 9.530                                                |
| H-(C $\equiv$ C) <sub>7</sub> -H | $\infty$                                    | 4.847                                                 | 1.245                                                                              | 12.049                                               |
|                                  | 1907                                        | 4.923                                                 | 1.248                                                                              | 12.275                                               |
|                                  | 1460                                        | 4.979                                                 | 1.249                                                                              | 12.440                                               |
|                                  | 1340                                        | 5.005                                                 | 1.250                                                                              | 12.516                                               |
|                                  | 1064                                        | 5.105                                                 | 1.253                                                                              | 12.808                                               |
| H-(C $\equiv$ C) <sub>8</sub> -H | $\infty$                                    | 6.070                                                 | 1.405                                                                              | 15.402                                               |
|                                  | 1907                                        | 6.182                                                 | 1.407                                                                              | 15.731                                               |
|                                  | 1460                                        | 6.264                                                 | 1.409                                                                              | 15.973                                               |

|                                   |          |        |       |        |
|-----------------------------------|----------|--------|-------|--------|
|                                   | 1340     | 6.302  | 1.410 | 16.085 |
|                                   | 1064     | 6.448  | 1.413 | 16.516 |
|                                   | $\infty$ | 7.391  | 1.564 | 19.044 |
|                                   | 1907     | 7.544  | 1.567 | 19.499 |
| H-(C $\equiv$ C) <sub>9</sub> -H  | 1460     | 7.657  | 1.569 | 19.834 |
|                                   | 1340     | 7.710  | 1.570 | 19.990 |
|                                   | 1064     | 7.914  | 1.574 | 20.593 |
|                                   | $\infty$ | 8.809  | 1.724 | 22.981 |
|                                   | 1907     | 9.013  | 1.727 | 23.585 |
| H-(C $\equiv$ C) <sub>10</sub> -H | 1460     | 9.164  | 1.729 | 24.033 |
|                                   | 1340     | 9.234  | 1.730 | 24.241 |
|                                   | 1064     | 9.507  | 1.734 | 25.052 |
|                                   | $\infty$ | 10.297 | 1.883 | 27.124 |
|                                   | 1907     | 10.557 | 1.887 | 27.898 |
| H-(C $\equiv$ C) <sub>11</sub> -H | 1460     | 10.751 | 1.889 | 28.474 |
|                                   | 1340     | 10.841 | 1.890 | 28.743 |
|                                   | 1064     | 11.194 | 1.895 | 29.793 |
|                                   | $\infty$ | 11.847 | 2.043 | 31.457 |
|                                   | 1907     | 12.171 | 2.046 | 32.421 |
| H-(C $\equiv$ C) <sub>12</sub> -H | 1460     | 12.413 | 2.049 | 33.141 |
|                                   | 1340     | 12.526 | 2.050 | 33.478 |
|                                   | 1064     | 12.969 | 2.055 | 34.798 |
|                                   | $\infty$ | 13.451 | 2.202 | 35.948 |
|                                   | 1907     | 13.844 | 2.206 | 37.119 |
| H-(C $\equiv$ C) <sub>13</sub> -H | 1460     | 14.138 | 2.209 | 37.997 |
|                                   | 1340     | 14.277 | 2.210 | 38.409 |
|                                   | 1064     | 14.820 | 2.215 | 40.028 |
|                                   | $\infty$ | 15.099 | 2.362 | 40.573 |
|                                   | 1907     | 15.566 | 2.366 | 41.967 |
| H-(C $\equiv$ C) <sub>14</sub> -H | 1460     | 15.918 | 2.369 | 43.015 |
|                                   | 1340     | 16.083 | 2.370 | 43.508 |
|                                   | 1064     | 16.735 | 2.376 | 45.453 |
| H-(C $\equiv$ C) <sub>15</sub> -H | $\infty$ | 16.784 | 2.521 | 45.310 |

|       |      |        |       |        |
|-------|------|--------|-------|--------|
| ----- | 1907 | 17.331 | 2.526 | 46.942 |
|       | 1460 | 17.744 | 2.529 | 48.173 |
|       | 1340 | 17.938 | 2.531 | 48.753 |
|       | 1064 | 18.707 | 2.536 | 51.048 |

---

**Table S13** Calculated second hyperpolarizability of the carbon chains H-(C≡C)<sub>n</sub>-H (*n* = 3-15) in the zero-frequency limit ( $\lambda = \infty$  nm) and in the frequency-dependent fields ( $\lambda = 1907, 1460, 1340,$  and  $1064$  nm) at the PBE38/LPol-ds level

|                         | Incident wavelength<br>( $\lambda$ , in nm) | $\gamma_{  }(\lambda)$<br>(in $10^{-34}$ esu) | $\gamma_{xxxx}(\lambda) = \gamma_{yyyy}(\lambda)$<br>(in $10^{-34}$ esu) | $\gamma_{zzzz}(\lambda)$<br>(in $10^{-34}$ esu) |
|-------------------------|---------------------------------------------|-----------------------------------------------|--------------------------------------------------------------------------|-------------------------------------------------|
| H-(C≡C) <sub>3</sub> -H | $\infty$                                    | 0.154                                         | 0.040                                                                    | 0.490                                           |
|                         | 1907                                        | 0.165                                         | 0.042                                                                    | 0.528                                           |
|                         | 1460                                        | 0.173                                         | 0.043                                                                    | 0.557                                           |
|                         | 1340                                        | 0.177                                         | 0.043                                                                    | 0.570                                           |
|                         | 1064                                        | 0.193                                         | 0.046                                                                    | 0.626                                           |
| H-(C≡C) <sub>4</sub> -H | $\infty$                                    | 0.383                                         | 0.046                                                                    | 1.540                                           |
|                         | 1907                                        | 0.418                                         | 0.048                                                                    | 1.690                                           |
|                         | 1460                                        | 0.446                                         | 0.049                                                                    | 1.809                                           |
|                         | 1340                                        | 0.459                                         | 0.050                                                                    | 1.867                                           |
|                         | 1064                                        | 0.514                                         | 0.052                                                                    | 2.108                                           |
| H-(C≡C) <sub>5</sub> -H | $\infty$                                    | 0.904                                         | 0.052                                                                    | 4.045                                           |
|                         | 1907                                        | 1.010                                         | 0.054                                                                    | 4.543                                           |
|                         | 1460                                        | 1.097                                         | 0.056                                                                    | 4.949                                           |
|                         | 1340                                        | 1.139                                         | 0.056                                                                    | 5.150                                           |
|                         | 1064                                        | 1.321                                         | 0.059                                                                    | 6.009                                           |
| H-(C≡C) <sub>6</sub> -H | $\infty$                                    | 1.968                                         | 0.058                                                                    | 9.264                                           |
|                         | 1907                                        | 2.257                                         | 0.060                                                                    | 10.665                                          |
|                         | 1460                                        | 2.499                                         | 0.062                                                                    | 11.844                                          |
|                         | 1340                                        | 2.622                                         | 0.063                                                                    | 12.439                                          |
|                         | 1064                                        | 3.162                                         | 0.066                                                                    | 15.074                                          |
| H-(C≡C) <sub>7</sub> -H | $\infty$                                    | 3.923                                         | 0.064                                                                    | 18.942                                          |
|                         | 1907                                        | 4.621                                         | 0.067                                                                    | 22.375                                          |
|                         | 1460                                        | 5.226                                         | 0.068                                                                    | 25.358                                          |
|                         | 1340                                        | 5.538                                         | 0.069                                                                    | 26.897                                          |
|                         | 1064                                        | 6.971                                         | 0.072                                                                    | 33.968                                          |
| H-(C≡C) <sub>8</sub> -H | $\infty$                                    | 7.196                                         | 0.071                                                                    | 35.204                                          |
|                         | 1907                                        | 8.702                                         | 0.073                                                                    | 42.670                                          |
|                         | 1460                                        | 10.055                                        | 0.075                                                                    | 49.376                                          |

|                          |      |         |       |          |
|--------------------------|------|---------|-------|----------|
|                          | 1340 | 10.767  | 0.076 | 52.910   |
|                          | 1064 | 14.169  | 0.079 | 69.804   |
|                          | ∞    | 12.250  | 0.077 | 60.378   |
|                          | 1907 | 15.201  | 0.079 | 75.049   |
| H-(C≡C) <sub>9</sub> -H  | 1460 | 17.935  | 0.081 | 88.654   |
|                          | 1340 | 19.407  | 0.082 | 95.982   |
|                          | 1064 | 26.730  | 0.086 | 132.444  |
|                          | ∞    | 19.578  | 0.083 | 96.917   |
|                          | 1907 | 24.905  | 0.086 | 123.457  |
| H-(C≡C) <sub>10</sub> -H | 1460 | 30.001  | 0.088 | 148.854  |
|                          | 1340 | 32.804  | 0.089 | 162.832  |
|                          | 1064 | 47.337  | 0.092 | 235.308  |
|                          | ∞    | 29.567  | 0.089 | 146.765  |
|                          | 1907 | 38.506  | 0.092 | 191.347  |
| H-(C≡C) <sub>11</sub> -H | 1460 | 47.316  | 0.094 | 235.302  |
|                          | 1340 | 52.265  | 0.095 | 260.000  |
|                          | 1064 | 78.999  | 0.099 | 393.437  |
|                          | ∞    | 42.557  | 0.093 | 211.625  |
|                          | 1907 | 56.659  | 0.096 | 282.012  |
| H-(C≡C) <sub>12</sub> -H | 1460 | 70.960  | 0.099 | 353.406  |
|                          | 1340 | 79.157  | 0.100 | 394.330  |
|                          | 1064 | 125.279 | 0.104 | 624.667  |
|                          | ∞    | 58.776  | 0.101 | 292.615  |
|                          | 1907 | 79.880  | 0.104 | 397.987  |
| H-(C≡C) <sub>13</sub> -H | 1460 | 101.860 | 0.107 | 507.760  |
|                          | 1340 | 114.701 | 0.108 | 571.897  |
|                          | 1064 | 189.931 | 0.112 | 947.721  |
|                          | ∞    | 78.360  | 0.108 | 390.424  |
|                          | 1907 | 108.543 | 0.112 | 541.183  |
| H-(C≡C) <sub>14</sub> -H | 1460 | 140.779 | 0.114 | 702.217  |
|                          | 1340 | 159.954 | 0.115 | 798.015  |
|                          | 1064 | 276.838 | 0.120 | 1382.050 |
| H-(C≡C) <sub>15</sub> -H | ∞    | 101.275 | 0.114 | 504.914  |

|       |      |         |       |          |
|-------|------|---------|-------|----------|
| ----- | 1907 | 142.786 | 0.117 | 712.290  |
|       | 1460 | 188.169 | 0.120 | 939.037  |
|       | 1340 | 215.631 | 0.121 | 1076.262 |
|       | 1064 | 389.643 | 0.126 | 1945.869 |

---

**Table S14** Calculated polarizability of the carbon chains H-(C≡C)<sub>n</sub>-H (*n* = 3-15) in



the zero-frequency limit ( $\lambda = \infty$  nm) and in the frequency-dependent fields ( $\lambda = 1907$ , 1460, 1340, and 1064 nm) at the PBE38/aug-cc-pVTZ level

|                                  | Incident wavelength<br>( $\lambda$ , in nm) | $\alpha_{\text{iso}}(\lambda)$<br>(in $10^{-23}$ esu) | $\alpha_{\text{xx}}(\lambda) = \alpha_{\text{yy}}(\lambda)$<br>(in $10^{-23}$ esu) | $\alpha_{\text{zz}}(\lambda)$<br>(in $10^{-23}$ esu) |
|----------------------------------|---------------------------------------------|-------------------------------------------------------|------------------------------------------------------------------------------------|------------------------------------------------------|
| H-(C $\equiv$ C) <sub>3</sub> -H | $\infty$                                    | 1.245                                                 | 0.603                                                                              | 2.528                                                |
|                                  | 1907                                        | 1.252                                                 | 0.605                                                                              | 2.547                                                |
|                                  | 1460                                        | 1.258                                                 | 0.606                                                                              | 2.561                                                |
|                                  | 1340                                        | 1.260                                                 | 0.606                                                                              | 2.568                                                |
|                                  | 1064                                        | 1.269                                                 | 0.608                                                                              | 2.592                                                |
| H-(C $\equiv$ C) <sub>4</sub> -H | $\infty$                                    | 1.928                                                 | 0.763                                                                              | 4.258                                                |
|                                  | 1907                                        | 1.944                                                 | 0.765                                                                              | 4.302                                                |
|                                  | 1460                                        | 1.955                                                 | 0.766                                                                              | 4.334                                                |
|                                  | 1340                                        | 1.961                                                 | 0.766                                                                              | 4.349                                                |
|                                  | 1064                                        | 1.980                                                 | 0.768                                                                              | 4.404                                                |
| H-(C $\equiv$ C) <sub>5</sub> -H | $\infty$                                    | 2.763                                                 | 0.923                                                                              | 6.443                                                |
|                                  | 1907                                        | 2.792                                                 | 0.924                                                                              | 6.529                                                |
|                                  | 1460                                        | 2.814                                                 | 0.926                                                                              | 6.590                                                |
|                                  | 1340                                        | 2.824                                                 | 0.926                                                                              | 6.618                                                |
|                                  | 1064                                        | 2.861                                                 | 0.928                                                                              | 6.726                                                |
| H-(C $\equiv$ C) <sub>6</sub> -H | $\infty$                                    | 3.741                                                 | 1.082                                                                              | 9.059                                                |
|                                  | 1907                                        | 3.790                                                 | 1.084                                                                              | 9.203                                                |
|                                  | 1460                                        | 3.826                                                 | 1.085                                                                              | 9.308                                                |
|                                  | 1340                                        | 3.843                                                 | 1.086                                                                              | 9.357                                                |
|                                  | 1064                                        | 3.906                                                 | 1.089                                                                              | 9.542                                                |
| H-(C $\equiv$ C) <sub>7</sub> -H | $\infty$                                    | 4.849                                                 | 1.241                                                                              | 12.066                                               |
|                                  | 1907                                        | 4.926                                                 | 1.243                                                                              | 12.291                                               |
|                                  | 1460                                        | 4.982                                                 | 1.245                                                                              | 12.456                                               |
|                                  | 1340                                        | 5.008                                                 | 1.246                                                                              | 12.532                                               |
|                                  | 1064                                        | 5.107                                                 | 1.249                                                                              | 12.824                                               |
| H-(C $\equiv$ C) <sub>8</sub> -H | $\infty$                                    | 6.075                                                 | 1.400                                                                              | 15.424                                               |
|                                  | 1907                                        | 6.186                                                 | 1.403                                                                              | 15.753                                               |
|                                  | 1460                                        | 6.268                                                 | 1.405                                                                              | 15.995                                               |

|                                   |          |        |       |        |
|-----------------------------------|----------|--------|-------|--------|
|                                   | 1340     | 6.306  | 1.406 | 16.107 |
|                                   | 1064     | 6.452  | 1.409 | 16.538 |
|                                   | $\infty$ | 7.397  | 1.559 | 19.073 |
|                                   | 1907     | 7.550  | 1.562 | 19.527 |
| H-(C $\equiv$ C) <sub>9</sub> -H  | 1460     | 7.664  | 1.564 | 19.863 |
|                                   | 1340     | 7.716  | 1.565 | 20.018 |
|                                   | 1064     | 7.920  | 1.569 | 20.622 |
|                                   | $\infty$ | 8.818  | 1.718 | 23.017 |
|                                   | 1907     | 9.021  | 1.722 | 23.621 |
| H-(C $\equiv$ C) <sub>10</sub> -H | 1460     | 9.172  | 1.724 | 24.069 |
|                                   | 1340     | 9.242  | 1.725 | 24.277 |
|                                   | 1064     | 9.515  | 1.729 | 25.089 |
|                                   | $\infty$ | 10.308 | 1.877 | 27.169 |
|                                   | 1907     | 10.568 | 1.881 | 27.943 |
| H-(C $\equiv$ C) <sub>11</sub> -H | 1460     | 10.762 | 1.883 | 28.519 |
|                                   | 1340     | 10.852 | 1.885 | 28.788 |
|                                   | 1064     | 11.205 | 1.889 | 29.839 |
|                                   | $\infty$ | 11.861 | 2.037 | 31.511 |
|                                   | 1907     | 12.185 | 2.040 | 32.475 |
| H-(C $\equiv$ C) <sub>12</sub> -H | 1460     | 12.427 | 2.043 | 33.195 |
|                                   | 1340     | 12.540 | 2.044 | 33.532 |
|                                   | 1064     | 12.984 | 2.049 | 34.853 |
|                                   | $\infty$ | 13.468 | 2.196 | 36.013 |
|                                   | 1907     | 13.861 | 2.200 | 37.185 |
| H-(C $\equiv$ C) <sub>13</sub> -H | 1460     | 14.156 | 2.203 | 38.063 |
|                                   | 1340     | 14.294 | 2.204 | 38.475 |
|                                   | 1064     | 14.838 | 2.209 | 40.095 |
|                                   | $\infty$ | 15.119 | 2.355 | 40.648 |
|                                   | 1907     | 15.587 | 2.359 | 42.043 |
| H-(C $\equiv$ C) <sub>14</sub> -H | 1460     | 15.939 | 2.362 | 43.092 |
|                                   | 1340     | 16.104 | 2.364 | 43.585 |
|                                   | 1064     | 16.756 | 2.369 | 45.532 |
| H-(C $\equiv$ C) <sub>15</sub> -H | $\infty$ | 16.808 | 2.514 | 45.397 |

|       |      |        |       |        |
|-------|------|--------|-------|--------|
| ----- | 1907 | 17.356 | 2.518 | 47.031 |
|       | 1460 | 17.769 | 2.522 | 48.263 |
|       | 1340 | 17.963 | 2.523 | 48.843 |
|       | 1064 | 18.732 | 2.529 | 51.140 |

---

**Table S15** Calculated second hyperpolarizability of the carbon chains H-(C≡C)<sub>n</sub>-H (*n* = 3-15) in the zero-frequency limit ( $\lambda = \infty$  nm) and in the frequency-dependent fields ( $\lambda = 1907, 1460, 1340,$  and  $1064$  nm) at the PBE38/aug-cc-pVTZ level

|                                  | Incident wavelength<br>( $\lambda$ , in nm) | $\gamma_{  }(\lambda)$<br>(in $10^{-34}$ esu) | $\gamma_{xxxx}(\lambda) = \gamma_{yyyy}(\lambda)$<br>(in $10^{-34}$ esu) | $\gamma_{zzzz}(\lambda)$<br>(in $10^{-34}$ esu) |
|----------------------------------|---------------------------------------------|-----------------------------------------------|--------------------------------------------------------------------------|-------------------------------------------------|
| H-(C $\equiv$ C) <sub>3</sub> -H | $\infty$                                    | 0.149                                         | 0.036                                                                    | 0.488                                           |
|                                  | 1907                                        | 0.159                                         | 0.038                                                                    | 0.525                                           |
|                                  | 1460                                        | 0.167                                         | 0.039                                                                    | 0.554                                           |
|                                  | 1340                                        | 0.171                                         | 0.039                                                                    | 0.568                                           |
|                                  | 1064                                        | 0.186                                         | 0.041                                                                    | 0.623                                           |
| H-(C $\equiv$ C) <sub>4</sub> -H | $\infty$                                    | 0.376                                         | 0.042                                                                    | 1.537                                           |
|                                  | 1907                                        | 0.411                                         | 0.044                                                                    | 1.687                                           |
|                                  | 1460                                        | 0.438                                         | 0.045                                                                    | 1.806                                           |
|                                  | 1340                                        | 0.451                                         | 0.046                                                                    | 1.864                                           |
|                                  | 1064                                        | 0.505                                         | 0.048                                                                    | 2.103                                           |
| H-(C $\equiv$ C) <sub>5</sub> -H | $\infty$                                    | 0.895                                         | 0.048                                                                    | 4.039                                           |
|                                  | 1907                                        | 1.000                                         | 0.050                                                                    | 4.535                                           |
|                                  | 1460                                        | 1.086                                         | 0.051                                                                    | 4.939                                           |
|                                  | 1340                                        | 1.128                                         | 0.052                                                                    | 5.139                                           |
|                                  | 1064                                        | 1.308                                         | 0.054                                                                    | 5.995                                           |
| H-(C $\equiv$ C) <sub>6</sub> -H | $\infty$                                    | 1.956                                         | 0.054                                                                    | 9.248                                           |
|                                  | 1907                                        | 2.243                                         | 0.056                                                                    | 10.645                                          |
|                                  | 1460                                        | 2.484                                         | 0.058                                                                    | 11.819                                          |
|                                  | 1340                                        | 2.605                                         | 0.058                                                                    | 12.412                                          |
|                                  | 1064                                        | 3.143                                         | 0.061                                                                    | 15.035                                          |
| H-(C $\equiv$ C) <sub>7</sub> -H | $\infty$                                    | 3.905                                         | 0.060                                                                    | 18.902                                          |
|                                  | 1907                                        | 4.599                                         | 0.062                                                                    | 22.321                                          |
|                                  | 1460                                        | 5.201                                         | 0.064                                                                    | 25.292                                          |
|                                  | 1340                                        | 5.511                                         | 0.065                                                                    | 26.824                                          |
|                                  | 1064                                        | 6.936                                         | 0.067                                                                    | 33.861                                          |
| H-(C $\equiv$ C) <sub>8</sub> -H | $\infty$                                    | 7.172                                         | 0.066                                                                    | 35.143                                          |
|                                  | 1907                                        | 8.672                                         | 0.069                                                                    | 42.582                                          |
|                                  | 1460                                        | 10.018                                        | 0.070                                                                    | 49.260                                          |
|                                  | 1340                                        | 10.727                                        | 0.071                                                                    | 52.779                                          |
|                                  | 1064                                        | 14.111                                        | 0.074                                                                    | 69.590                                          |
| H-(C $\equiv$ C) <sub>9</sub> -H | $\infty$                                    | 12.220                                        | 0.072                                                                    | 60.286                                          |

|                          |      |         |       |          |
|--------------------------|------|---------|-------|----------|
|                          | 1907 | 15.159  | 0.075 | 74.907   |
|                          | 1460 | 17.882  | 0.076 | 88.459   |
|                          | 1340 | 19.347  | 0.077 | 95.756   |
|                          | 1064 | 26.632  | 0.080 | 132.041  |
|                          | ∞    | 19.541  | 0.078 | 96.795   |
| H-(C≡C) <sub>10</sub> -H | 1907 | 24.850  | 0.081 | 123.253  |
|                          | 1460 | 29.926  | 0.083 | 148.557  |
|                          | 1340 | 32.717  | 0.084 | 162.478  |
|                          | 1064 | 47.178  | 0.087 | 234.610  |
|                          | ∞    | 29.525  | 0.084 | 146.621  |
| H-(C≡C) <sub>11</sub> -H | 1907 | 38.437  | 0.087 | 191.079  |
|                          | 1460 | 47.216  | 0.089 | 234.888  |
|                          | 1340 | 52.147  | 0.090 | 259.493  |
|                          | 1064 | 78.756  | 0.094 | 392.328  |
|                          | ∞    | 42.518  | 0.090 | 211.496  |
| H-(C≡C) <sub>12</sub> -H | 1907 | 56.586  | 0.093 | 281.715  |
|                          | 1460 | 70.843  | 0.095 | 352.898  |
|                          | 1340 | 79.012  | 0.096 | 393.685  |
|                          | 1064 | 124.934 | 0.100 | 623.040  |
|                          | ∞    | 58.748  | 0.096 | 292.547  |
| H-(C≡C) <sub>13</sub> -H | 1907 | 79.810  | 0.099 | 397.723  |
|                          | 1460 | 101.734 | 0.102 | 507.226  |
|                          | 1340 | 114.537 | 0.103 | 571.177  |
|                          | 1064 | 189.477 | 0.107 | 945.570  |
|                          | ∞    | 78.333  | 0.102 | 390.377  |
| H-(C≡C) <sub>14</sub> -H | 1907 | 108.466 | 0.106 | 540.891  |
|                          | 1460 | 140.627 | 0.108 | 701.562  |
|                          | 1340 | 159.751 | 0.109 | 797.108  |
|                          | 1064 | 276.208 | 0.113 | 1379.028 |
|                          | ∞    | 101.307 | 0.109 | 505.156  |
| H-(C≡C) <sub>15</sub> -H | 1907 | 142.773 | 0.112 | 712.315  |
|                          | 1460 | 188.080 | 0.114 | 938.695  |
|                          | 1340 | 215.485 | 0.115 | 1075.638 |

|       |      |         |       |          |
|-------|------|---------|-------|----------|
| ----- | 1064 | 388.954 | 0.120 | 1942.554 |
|-------|------|---------|-------|----------|
